# Supplementary material for: Incidence of hemoparasitic infections in cattle from central and northern Thailand
Source: PeerJ. 2022 Aug 10;10:e13835. doi: 10.7717/peerj.13835 (PMC9375545; doi:10.7717/peerj.13835)
Supplement: Supplemental Information 9 [file peerj-10-13835-s009.xlsx]

## Sheet: LPU7
No	Sample	Note	cattle information			Date	Sample	PCV (23-33%)	PCR								Sample
									Babesia			Theileria			Anaplasma
			Age (year,month)	Species	District				Babesia spp.	B. bovis	B. bigemina	Theileria spp.	T. orientalis	T. anulata	A. marginale	A. phagocytophilum
1	C1003	VS01	7	Beef	Li/Lumphun	30-31 .03.21	C1003	33	Neg	Neg	Neg	1	1	Neg	1	Neg	C1003
2	C1004	VS02	4	Beef			C1004	23	Neg	Neg	Neg	1	1	Neg	1	Neg	C1004
3	C1005	VS03	8	Beef			C1005	35	Neg	Neg	Neg	1	1	Neg	1	Neg	C1005
4	C1006	VS04	5	Beef			C1006	32	Neg	Neg	Neg	1	1	Neg	1	Neg	C1006
5	C1007	VS05	7	Beef			C1007	33	Neg	Neg	Neg	1	1	Neg	1	Neg	C1007
6	C1008	VS06	7	Beef			C1008	33	Neg	Neg	Neg	1	1	Neg	1	Neg	C1008
7	C1009	VS07	5	Beef			C1009	33	Neg	Neg	Neg	Neg	Neg	Neg	1	Neg	C1009
8	C1010	VS08	4	Beef			C1010	28	Neg	Neg	Neg	1	1	Neg	1	Neg	C1010
9	C1011	VS09	4	Beef			C1011	37	Neg	Neg	Neg	1	1	Neg	1	Neg	C1011
10	C1012	VS10	3	Beef			C1012	44	Neg	Neg	Neg	1	1	Neg	1	Neg	C1012
11	C1013	VS11	4	Beef			C1013	34	Neg	Neg	Neg	1	1	Neg	1	Neg	C1013
12	C1014	VS12	4	Beef			C1014	34	Neg	Neg	Neg	1	1	Neg	1	Neg	C1014
13	C1015	VS13	3	Beef			C1015	39	Neg	Neg	Neg	Neg	Neg	Neg	1	Neg	C1015
14	C1016	VS14	4	Beef			C1016	34	Neg	Neg	Neg	1	1	Neg	1	Neg	C1016
15	C1017	VS15	3	Beef			C1017	39	Neg	Neg	Neg	Neg	Neg	Neg	1	Neg	C1017
16	C1018	VS16	5	Beef			C1018	33	Neg	Neg	Neg	1	1	Neg	1	Neg	C1018
17	C1019	VS17	5	Beef			C1019	35	Neg	Neg	Neg	1	1	Neg	1	Neg	C1019
18	C1020	VS18	8	Beef			C1020	30	Neg	Neg	Neg	1	1	Neg	1	Neg	C1020
19	C1021	VS19	4	Beef			C1021	34	Neg	Neg	Neg	1	1	Neg	1	Neg	C1021
20	C1022	VS20	5	Beef			C1022	32	Neg	Neg	Neg	1	1	Neg	1	Neg	C1022
21	C1023	VS21	5	Beef			C1023	35	Neg	Neg	Neg	1	1	Neg	1	Neg	C1023
22	C1024	VS22	6	Beef			C1024	29	Neg	Neg	Neg	1	1	Neg	1	Neg	C1024
23	C1025	VS23	11	Beef			C1025	33	Neg	Neg	Neg	1	1	Neg	1	Neg	C1025
24	C1026	VS24	8	Beef			C1026	37	Neg	Neg	Neg	1	1	Neg	Neg	Neg	C1026
25	C1027	VS25		Beef			C1027	35	Neg	Neg	Neg	1	1	Neg	1	Neg	C1027
26	C1028	WS01	3	Beef			C1028	34	Neg	Neg	Neg	1	1	Neg	1	Neg	C1028
27	C1029	WS02	3	Beef			C1029	42	Neg	Neg	Neg	1	1	Neg	1	Neg	C1029
28	C1030	WS03	7	Beef			C1030	33	Neg	Neg	Neg	1	1	Neg	1	Neg	C1030
29	C1031	WS04	4	Beef			C1031	42	Neg	Neg	Neg	1	1	Neg	1	Neg	C1031
30	C1032	WS05	7	Beef			C1032	33	Neg	Neg	Neg	1	1	Neg	1	Neg	C1032
31	C1033	WS06	4	Beef			C1033	40	Neg	Neg	Neg	1	1	Neg	1	Neg	C1033
32	C1034	WS07	3	Beef			C1034	44	Neg	Neg	Neg	1	1	Neg	1	Neg	C1034
33	C1035	WS08	3	Beef			C1035	44	Neg	Neg	Neg	1	1	Neg	1	Neg	C1035
34	C1036	WS09	3	Beef			C1036	45	Neg	Neg	Neg	1	1	Neg	1	Neg	C1036
35	C1037	WS10	1	Beef			C1037	38	Neg	Neg	Neg	1	1	Neg	1	Neg	C1037
36	C1038	WS11	3	Beef			C1038	41	Neg	Neg	Neg	Neg	Neg	Neg	1	Neg	C1038
37	C1039	WS12	7	Beef			C1039	37	Neg	Neg	Neg	1	1	Neg	1	Neg	C1039
38	C1040	WS13	6	Beef			C1040	33	Neg	Neg	Neg	1	1	Neg	1	Neg	C1040
39	C1041	WS14	6	Beef			C1041	43	Neg	Neg	Neg	1	1	Neg	1	Neg	C1041
40	C1042	WS15	10	Beef			C1042	38	Neg	Neg	Neg	1	1	Neg	1	Neg	C1042
41	C1043	WS16	8	Beef			C1043	40	Neg	Neg	Neg	1	1	Neg	1	Neg	C1043
42	C1044	WS17	7	Beef			C1044	25	Neg	Neg	Neg	1	1	Neg	1	Neg	C1044
43	C1045	WS18	7	Beef			C1045	33	Neg	Neg	Neg	1	1	Neg	1	Neg	C1045
44	C1046	WS19	8	Beef			C1046	33	Neg	Neg	Neg	1	1	Neg	1	Neg	C1046
45	C1047	WS20	4	Beef			C1047	38	Neg	Neg	Neg	1	1	Neg	1	Neg	C1047
46	C1048	WS21	5	Beef			C1048	32	Neg	Neg	Neg	1	1	Neg	1	Neg	C1048
47	C1049	WS22	3	Beef			C1049	44	Neg	Neg	Neg	Neg	Neg	Neg	1	Neg	C1049
48	C1050	WS23	3	Beef			C1050	44	Neg	Neg	Neg	Neg	Neg	Neg	1	Neg	C1050
49	C1051	WS24	3	Beef			C1051	46	Neg	Neg	Neg	1	1	Neg	1	Neg	C1051
50	C1052	WS25	5	Beef			C1052	34	Neg	Neg	Neg	1	1	Neg	1	Neg	C1052
51	C1053	WS26	5	Beef			C1053	42	Neg	Neg	Neg	1	1	Neg	1	Neg	C1053
52	C1054	WS27	5	Beef			C1054	38	Neg	Neg	Neg	1	1	Neg	Neg	Neg	C1054
53	C1055	WS28	10	Beef			C1055	34	Neg	Neg	Neg	1	1	Neg	1	Neg	C1055
54	C1056	WS29	3	Beef			C1056	45	Neg	Neg	Neg	Neg	Neg	Neg	1	Neg	C1056
55	C1057	WS30	5	Beef			C1057	39	Neg	Neg	Neg	1	1	Neg	1	Neg	C1057
56	C1058	WS31	3	Beef			C1058	45	Neg	Neg	Neg	1	1	Neg	1	Neg	C1058
57	C1059	WS32	5	Beef			C1059	35	Neg	Neg	Neg	Neg	Neg	Neg	1	Neg	C1059
58	C1060	WS33	3	Beef			C1060	42	Neg	Neg	Neg	1	1	Neg	1	Neg	C1060
59	C1061	WS34	5	Beef			C1061	45	Neg	Neg	Neg	1	1	Neg	1	Neg	C1061
60	C1062	WS35	4	Beef			C1062	50	Neg	Neg	Neg	1	1	Neg	1	Neg	C1062
61	C1063	WS36	1	Beef			C1063	41	Neg	Neg	Neg	Neg	Neg	Neg	1	Neg	C1063
62	C1064	WS37	1	Beef			C1064	43	Neg	Neg	Neg	Neg	Neg	Neg	1	Neg	C1064
63	C1065	WS38	6	Beef			C1065	40	Neg	Neg	Neg	1	1	Neg	1	Neg	C1065
64	C1066	WS39	1	Beef			C1066	40	Neg	Neg	Neg	Neg	Neg	Neg	1	Neg	C1066
												53	53	0	62	0

## Sheet: PY
No	Sample	Note	cattle information			Date	Sample	PCV (23-33%)	PCR								Sample
									Babesia			Theileria			Anaplasma
			Age (year,month)	Species	District				Babesia spp.	B. bovis	B. bigemina	Theileria spp.	T. orientalis	T. anulata	A. marginale	A. phagocytophilum
1	C881	ผู้ดำ 10		Beef	Chiangkhum/ Phayao	2021-03-23	C881	32	Neg	Neg	Neg	1	1	Neg	1	Neg	C881
2	C882	หมอก 9		Beef			C882	24	Neg	Neg	Neg	1	1	Neg	1	Neg	C882
3	C883	ขาว 11		Beef			C883	42	Neg	Neg	Neg	Neg	Neg	Neg	1	Neg	C883
4	C884	12		Beef			C884	32	Neg	Neg	Neg	Neg	Neg	Neg	1	Neg	C884
5	C885	13		Beef			C885	31	Neg	Neg	Neg	1	1	Neg	Neg	Neg	C885
6	C886	15		Beef			C886	50	Neg	Neg	Neg	1	1	Neg	1	Neg	C886
7	C887	16		Beef			C887	43	Neg	Neg	Neg	1	1	Neg	Neg	Neg	C887
8	C888	18		Beef			C888	48	Neg	Neg	Neg	1	1	Neg	1	Neg	C888
9	C889	1		Beef			C889	40	Neg	Neg	Neg	1	1	Neg	1	Neg	C889
10	C890	2		Beef			C890	42	Neg	Neg	Neg	Neg	Neg	Neg	1	Neg	C890
11	C891	3		Beef			C891	39	Neg	Neg	Neg	Neg	Neg	Neg	1	Neg	C891
12	C892	5		Beef			C892	41	Neg	Neg	Neg	Neg	Neg	Neg	1	Neg	C892
13	C893	6		Beef			C893	41	Neg	Neg	Neg	1	1	Neg	1	Neg	C893
14	C894	7		Beef			C894	40	Neg	Neg	Neg	1	1	Neg	Neg	Neg	C894
15	C895	8		Beef			C895	43	Neg	Neg	Neg	1	1	Neg	1	Neg	C895
16	C896	มะขาม 1		Beef			C896	27	Neg	Neg	Neg	1	1	Neg	Neg	Neg	C896
17	C897	มะขาม 2		Beef			C897	26	Neg	Neg	Neg	1	1	Neg	1	Neg	C897
18	C898	มะขาม 3		Beef			C898	35	Neg	Neg	Neg	Neg	Neg	Neg	1	Neg	C898
19	C899	มะขาม 4		Beef			C899	34	Neg	Neg	Neg	Neg	Neg	Neg	Neg	Neg	C899
20	C900	มะขาม 5 (ดำผิวเรียบ,เงา)		Beef			C900	25	Neg	Neg	Neg	Neg	Neg	Neg	1	Neg	C900
21	C901	มะขาม 6 (ดำไม่มีเขา)		Beef			C901	34	Neg	Neg	Neg	1	1	Neg	Neg	Neg	C901
22	C902	มะขาม 7 (ตัวเล็กสุด)		Beef			C902	28	Neg	Neg	Neg	Neg	Neg	Neg	1	Neg	C902
23	C903	มะขาม 8 (หน้าเมือง)		Beef			C903	30	Neg	Neg	Neg	1	1	Neg	Neg	Neg	C903
24	C904	มะขาม 9		Beef			C904	23	Neg	Neg	Neg	1	1	Neg	Neg	Neg	C904
25	C905	มะขาม 10 (สีนวล,ผิวเงา)		Beef			C905	25	Neg	Neg	Neg	Neg	Neg	Neg	Neg	Neg	C905
26	C906	สะเดา 1		Beef			C906	41	Neg	Neg	Neg	1	1	Neg	1	Neg	C906
27	C907	สะเดา 2		Beef			C907	34	Neg	Neg	Neg	Neg	Neg	Neg	1	Neg	C907
28	C908	สะเดา 3		Beef			C908	36	Neg	Neg	Neg	Neg	Neg	Neg	1	Neg	C908
29	C909	สะเดา 4		Beef			C909	33	Neg	Neg	Neg	Neg	Neg	Neg	1	Neg	C909
30	C910	กอไผ่ 1		Beef			C910	45	Neg	Neg	Neg	1	1	Neg	1	Neg	C910
31	C911	กอไผ่ 2		Beef			C911	35	Neg	Neg	Neg	1	1	Neg	1	Neg	C911
32	C912	กอไผ่ 3		Beef			C912	57	Neg	Neg	Neg	1	1	Neg	1	Neg	C912
33	C913	กอไผ่ 4		Beef			C913	40	Neg	Neg	Neg	Neg	Neg	Neg	Neg	Neg	C913
34	C914	แม่พันธุ์ 1 (มุก)		Beef			C914	30	Neg	Neg	Neg	1	1	Neg	1	Neg	C914
35	C915	แม่พันธุ์ 2		Beef			C915	34	Neg	Neg	Neg	1	1	Neg	1	Neg	C915
36	C916	แม่พันธุ์ 3		Beef			C916	26	Neg	Neg	Neg	1	1	Neg	1	Neg	C916
37	C917	แม่พันธุ์ 4		Beef			C917	28	Neg	Neg	Neg	1	1	Neg	1	Neg	C917
38	C918	แม่พันธุ์ 5		Beef			C918	28	Neg	Neg	Neg	1	1	Neg	1	Neg	C918
39	C919	แม่พันธุ์ 6		Beef			C919	40	Neg	Neg	Neg	1	1	Neg	1	Neg	C919
40	C920	แม่พันธุ์ 7 (ดำ)		Beef			C920	40	Neg	Neg	Neg	1	1	Neg	1	Neg	C920
41	C921	แม่พันธุ์ 8 (งุบ,เขาเดียว)		Beef			C921	36	Neg	Neg	Neg	1	1	Neg	1	Neg	C921
42	C922	แม่พันธุ์ 9 (น้ำฝน)		Beef			C922	44	Neg	Neg	Neg	1	1	Neg	1	Neg	C922
43	C923	แม่พันธุ์ 10 (ดำเชียงใหม่)		Beef			C923	36	Neg	Neg	Neg	1	1	Neg	Neg	Neg	C923
44	C924	แม่พันธุ์ 11 (โซ้ง)		Beef			C924	32	Neg	Neg	Neg	1	1	Neg	1	Neg	C924
45	C925	แม่พันธุ์ 12 (แม่จกขาวน้อย)		Beef			C925	28	Neg	Neg	Neg	1	1	Neg	1	Neg	C925
46	C926	แม่พันธุ์ 13 (แซ่ง)		Beef			C926	30	Neg	Neg	Neg	1	1	Neg	1	Neg	C926
47	C927	แม่พันธุ์ 14 (ดำเปาบุ้นจิ้น)		Beef			C927	33	Neg	Neg	Neg	1	1	Neg	Neg	Neg	C927
48	C928	แม่พันธุ์ 15 (แซ้งธนาคาร)		Beef			C928	41	Neg	Neg	Neg	1	1	Neg	1	Neg	C928
49	C929	เสือ	4	Beef	Chiangkhum/ Phayao	2021-03-24	C929	31	Neg	Neg	Neg	1	1	Neg	1	Neg	C929
50	C930	มาลัย	3	Beef			C930	32	Neg	Neg	Neg	1	1	Neg	1	Neg	C930
51	C931	คล้าว (ตัวผู้)	2	Beef			C931	32	Neg	Neg	Neg	1	1	Neg	1	Neg	C931
52	C932	ดอกบัว	6	Beef			C932	34	Neg	Neg	Neg	1	1	Neg	1	Neg	C932
53	C933	ส้มปีป	6	Beef			C933	46	Neg	Neg	Neg	1	1	Neg	1	Neg	C933
54	C934	นกยูง	6	Beef			C934	27	Neg	Neg	Neg	1	1	Neg	Neg	Neg	C934
55	C935	ม้า	6	Beef			C935	33	Neg	Neg	Neg	1	1	Neg	1	Neg	C935
56	C936	ยู่ยี่	4	Beef			C936	26	Neg	Neg	Neg	1	1	Neg	Neg	Neg	C936
57	C937	อูฐ/1	5	Beef	Phusang/ Phayao		C937	28	Neg	Neg	Neg	1	1	Neg	1	Neg	C937
58	C938	สีนวล-เขาแหลม-หูสั้น/1	5	Beef			C938	33	Neg	Neg	Neg	1	1	Neg	1	Neg	C938
59	C939	ดำเงา-ไม่มีเขา-หูสั้น/1	5	Beef			C939	38	Neg	Neg	Neg	1	1	Neg	1	Neg	C939
60	C940	ขาวเผือก-เขาขาว/2	5	Beef			C940	40	Neg	Neg	Neg	1	1	Neg	Neg	Neg	C940
61	C941	สีนวล-เขานวลแหลม/2	5	Beef			C941	36	Neg	Neg	Neg	1	1	Neg	1	Neg	C941
62	C942	น้ำตาลเข้ม-เขาทู่/3	4	Beef			C942	30	Neg	Neg	Neg	1	1	Neg	1	Neg	C942
63	C943	ขาว-มีขน/4	1	Beef			C943	33	Neg	Neg	Neg	1	1	Neg	1	Neg	C943
64	C944	ผอม-หูฉีก-ท้องลายจุด/4	1	Beef			C944	35	Neg	Neg	Neg	1	1	Neg	1	Neg	C944
65	C945	หน้าน้ำตาลเข้ม-สีน้ำตาลอ่อน/4	1	Beef			C945	39	Neg	Neg	Neg	1	1	Neg	1	Neg	C945
66	C946	สีดำแม่ลูกอ่อน/5	3.5	Beef			C946	30	Neg	Neg	Neg	1	1	Neg	Neg	Neg	C946
67	C947	บี้	8	Beef			C947	32	Neg	Neg	Neg	1	1	Neg	1	Neg	C947
68	C948	โชค	11	Beef			C948	30	Neg	Neg	Neg	1	1	Neg	Neg	Neg	C948
69	C949	เอสเค	1.5	Beef			C949	34	Neg	Neg	Neg	1	1	Neg	Neg	Neg	C949
70	C950	อำเภอ (แม่ลูกอ่อน)	5	Beef			C950	38	Neg	Neg	Neg	1	1	Neg	Neg	Neg	C950
71	C951	วัวผอม (ป่วย)		Beef			C951	24	Neg	Neg	Neg	1	1	Neg	1	Neg	C951
72	C952	หยอง	1	Beef			C952	32	Neg	Neg	Neg	1	1	Neg	1	Neg	C952
73	C953	ซัสดำ	1	Beef			C953	34	Neg	Neg	Neg	Neg	Neg	Neg	Neg	Neg	C953
74	C954	ไหมฟ้า	1	Beef	Chiangkhum/ Phayao		C954	25	Neg	Neg	Neg	Neg	Neg	Neg	1	Neg	C954
75	C955	ฝ้าย (ตัวเล็กมีขน)	1	Beef			C955	36	Neg	Neg	Neg	1	1	Neg	1	Neg	C955
76	C956	นำโชค (น้ำตาล)	1	Beef			C956	32	Neg	Neg	Neg	1	1	Neg	1	Neg	C956
77	C957	ดำน้อย (โตน้ำตาล-ดำ)	1	Beef			C957	28	Neg	Neg	Neg	1	1	Neg	1	Neg	C957
78	C958	รักแร้	4	Beef			C958	28	Neg	Neg	Neg	1	1	Neg	1	Neg	C958
79	C959	บี้ขาว	6	Beef			C959	28	Neg	Neg	Neg	1	1	Neg	1	Neg	C959
80	C960	ขาวใหญ่	6	Beef			C960	27	Neg	Neg	Neg	1	1	Neg	1	Neg	C960
81	C961	เร่ใหญ่	4	Beef			C961	25	Neg	Neg	Neg	1	1	Neg	1	Neg	C961
82	C962	แองกัส	5	Beef			C962	22	Neg	Neg	Neg	1	1	Neg	1	Neg	C962
83	C963	แดงเข้มใหญ่	6	Beef			C963	30	Neg	Neg	Neg	1	1	Neg	Neg	Neg	C963
84	C964	ใหญ่	6	Beef			C964	27	Neg	Neg	Neg	1	1	Neg	1	Neg	C964
85	C965	ไหม	5	Beef			C965	26	Neg	Neg	Neg	1	1	Neg	1	Neg	C965
86	C966	ขาวกลาง	4	Beef			C966	29	Neg	Neg	Neg	1	1	Neg	1	Neg	C966
87	C967	แดงเข้มเล็ก	6	Beef			C967	28	Neg	Neg	Neg	1	1	Neg	Neg	Neg	C967
88	C968	แดงหน้าเล็ก	3	Beef			C968	30	Neg	Neg	Neg	1	1	Neg	1	Neg	C968
89	C969	แดงหลวงขัน	2	Beef			C969	3	Neg	Neg	Neg	1	1	Neg	1	Neg	C969
90	C970	ไหมเมือง	4	Beef			C970	28	Neg	Neg	Neg	1	1	Neg	1	Neg	C970
91	C971	แดงหน้าม้า	3	Beef			C971	33	Neg	Neg	Neg	1	1	Neg	1	Neg	C971
92	C972	แม่ทองคำ	6	Beef			C972	24	Neg	Neg	Neg	1	1	Neg	1	Neg	C972
93	C973	แม่เทา	6	Beef			C973	30	Neg	Neg	Neg	1	1	Neg	1	Neg	C973
94	C974	แดงปากใหญ่	3	Beef			C974	37	Neg	Neg	Neg	1	1	Neg	1	Neg	C974
95	C975	ศรีลังกา (ดำใหญ่)	4	Beef			C975	40	Neg	Neg	Neg	1	1	Neg	1	Neg	C975
96	C976	เร่น้อย	3	Beef			C976	24	Neg	Neg	Neg	1	1	Neg	1	Neg	C976
97	C977	แม่แดงงาม	9	Beef			C977	39	Neg	Neg	Neg	1	1	Neg	1	Neg	C977
98	C978	นวลเล่ล์	7	Beef			C978	29	Neg	Neg	Neg	1	1	Neg	1	Neg	C978
99	C979	ปุยฝ้าย	6	Beef		2021-03-25	C979	30	Neg	Neg	Neg	1	1	Neg	1	Neg	C979
100	C980	มะลิ	6	Beef			C980	29	Neg	Neg	Neg	1	1	Neg	1	Neg	C980
101	C981	ดอกแก้ว	5	Beef			C981	35	Neg	Neg	Neg	1	1	Neg	Neg	Neg	C981
102	C982	แม่สั้น	6	Beef			C982	38	Neg	Neg	Neg	1	1	Neg	Neg	Neg	C982
103	C983	แม่อ้วน	6	Beef			C983	28	Neg	Neg	Neg	1	1	Neg	1	Neg	C983
104	C984	สิงห์	1.5	Beef			C984	34	Neg	Neg	Neg	Neg	Neg	Neg	Neg	Neg	C984
105	C985	ลูกแม่มะลิ	1	Beef			C985	34	Neg	Neg	Neg	1	1	Neg	Neg	Neg	C985
106	C986	กุหลาบ	3	Beef			C986	37	Neg	Neg	Neg	1	1	Neg	1	Neg	C986
107	C987	มะลิ	2	Beef			C987	40	Neg	Neg	Neg	1	1	Neg	1	Neg	C987
108	C988	แรมโบ้	1	Beef			C988	30	Neg	Neg	Neg	1	1	Neg	Neg	Neg	C988
109	C989	เดี่ยว	3	Beef			C989	42	Neg	Neg	Neg	1	1	Neg	1	Neg	C989
110	C990	พะเยา	3	Beef			C990	49	Neg	Neg	Neg	Neg	Neg	Neg	Neg	Neg	C990
111	C991	น่าน	2.5	Beef			C991	35	Neg	Neg	Neg	1	1	Neg	Neg	Neg	C991
112	C992	แหลม	3	Beef			C992	37	Neg	Neg	Neg	1	1	Neg	1	Neg	C992
113	C993	มอม	3	Beef			C993	37	Neg	Neg	Neg	1	1	Neg	1	Neg	C993
114	C994	สอง	1	Beef			C994	40	Neg	Neg	Neg	1	1	Neg	1	Neg	C994
115	C995	ยี่	1	Beef			C995	33	Neg	Neg	Neg	1	1	Neg	Neg	Neg	C995
116	C996	ฟ้าลั่น	1	Beef			C996	34	Neg	Neg	Neg	Neg	Neg	Neg	1	Neg	C996
117	C997	นำโชค	3	Beef			C997	36	Neg	Neg	Neg	1	1	Neg	1	Neg	C997
118	C998	แม่บัวขาว	6	Beef			C998	41	Neg	Neg	Neg	1	1	Neg	1	Neg	C998
119	C999	แม่บัวบาน	1.4	Beef			C999	36	Neg	Neg	Neg	1	1	Neg	1	Neg	C999
120	C1000	มีโชค	3	Beef			C1000	47	Neg	Neg	Neg	1	1	Neg	1	Neg	C1000
121	C1001	พูน	2	Beef			C1001	36	Neg	Neg	Neg	Neg	Neg	Neg	1	Neg	C1001
122	C1002	ทองแดง	7	Beef			C1002	29	Neg	Neg	Neg	1	1	Neg	1	Neg	C1002
												102	102	0	92	0

## Sheet: LPU6
No	Sample	Note	cattle information			Date	Sample	PCV (23-33%)	PCR								Sample
									Babesia			Theileria			Anaplasma
			Age (year,month)	Species	District				Babesia spp.	B. bovis	B. bigemina	Theileria spp.	T. orientalis	T. anulata	A. marginale	A. phagocytophilum
1	C845	RN001		Beef	Li/ Lumphun	2021-02-27	C845	21	Neg	Neg	Neg	1	1	Neg	1	Neg	C845
2	C846	RN002		Beef		2021-02-27	C846	41	Neg	Neg	Neg	1	1	Neg	Neg	Neg	C846
3	C847	RN004		Beef		2021-02-27	C847	46	Neg	Neg	Neg	1	1	Neg	1	Neg	C847
4	C848	SP007		Beef	Li/ Lumphun	2021-02-27	C848	35	Neg	Neg	Neg	1	1	Neg	1	Neg	C848
5	C849	SP009		Beef		2021-02-27	C849	36	Neg	Neg	Neg	1	1	Neg	1	Neg	C849
6	C850	SP006		Beef		2021-02-27	C850	35	Neg	Neg	Neg	1	Neg	Neg	1	Neg	C850
7	C851	SP008		Beef		2021-02-27	C851	42	Neg	Neg	Neg	1	Neg	Neg	Neg	Neg	C851
8	C852	SP010		Beef		2021-02-27	C852	32	Neg	Neg	Neg	1	Neg	Neg	1	Neg	C852
9	C853	SP001		Beef		2021-02-27	C853	39	Neg	Neg	Neg	1	Neg	Neg	1	Neg	C853
10	C854	SP002		Beef		2021-02-27	C854	41	Neg	Neg	Neg	1	1	Neg	Neg	Neg	C854
11	C855	SP004		Beef		2021-02-27	C855	47	Neg	Neg	Neg	Neg	Neg	Neg	Neg	Neg	C855
12	C856	SP005		Beef		2021-02-27	C856	41	Neg	Neg	Neg	1	1	Neg	1	Neg	C856
13	C857	SP003		Beef		2021-02-27	C857	30	Neg	Neg	Neg	1	Neg	Neg	1	Neg	C857
14	C858	SP018		Beef		2021-02-27	C858	50	Neg	Neg	Neg	1	Neg	Neg	1	Neg	C858
15	C859	SP019		Beef		2021-02-27	C859	30	Neg	Neg	Neg	1	Neg	Neg	1	Neg	C859
16	C860	SP017		Beef		2021-02-27	C860	36	Neg	Neg	Neg	1	Neg	Neg	1	Neg	C860
17	C861	SP014		Beef		2021-02-27	C861	39	Neg	Neg	Neg	Neg	Neg	Neg	Neg	Neg	C861
18	C862	SP013		Beef		2021-02-27	C862	45	Neg	Neg	Neg	1	Neg	Neg	Neg	Neg	C862
19	C863	SP016		Beef		2021-02-27	C863	37	Neg	Neg	Neg	1	Neg	Neg	1	Neg	C863
20	C864	SP015		Beef		2021-02-27	C864	35	Neg	Neg	Neg	Neg	Neg	Neg	Neg	Neg	C864
21	C865	SP012		Beef		2021-02-27	C865	42	Neg	Neg	Neg	1	Neg	Neg	Neg	Neg	C865
22	C866	ST017		Beef	Li/ Lumphun	2021-02-27	C866	35	Neg	Neg	Neg	1	Neg	Neg	Neg	Neg	C866
23	C867	ST003		Beef		2021-02-27	C867	39	Neg	Neg	Neg	1	Neg	Neg	Neg	Neg	C867
24	C868	ST002		Beef		2021-02-27	C868	31	Neg	Neg	Neg	1	Neg	Neg	1	Neg	C868
25	C869	ST005		Beef		2021-02-27	C869	45	Neg	Neg	Neg	Neg	Neg	Neg	Neg	Neg	C869
26	C870	ST001		Beef		2021-02-27	C870	31	Neg	Neg	Neg	1	1	Neg	Neg	Neg	C870
27	C871	P001		Beef	Li/ Lumphun	2021-02-27	C871	30	Neg	Neg	Neg	Neg	Neg	Neg	Neg	Neg	C871
28	C872	P004		Beef		2021-02-27	C872	25	Neg	Neg	Neg	1	Neg	Neg	1	Neg	C872
29	C873	P003		Beef		2021-02-27	C873	38	Neg	Neg	Neg	1	Neg	Neg	1	Neg	C873
30	C874	P006		Beef		2021-02-27	C874	25	Neg	Neg	Neg	1	Neg	Neg	1	Neg	C874
31	C875	P005		Beef		2021-02-27	C875	30	Neg	Neg	Neg	1	Neg	Neg	1	Neg	C875
32	C876	P007		Beef		2021-02-27	C876	35	Neg	Neg	Neg	1	Neg	Neg	Neg	Neg	C876
33	C877	P009		Beef		2021-02-27	C877	33	Neg	Neg	Neg	1	Neg	Neg	1	Neg	C877
34	C878	P011		Beef		2021-02-27	C878	29	Neg	Neg	Neg	Neg	Neg	Neg	Neg	Neg	C878
35	C879	P010		Beef		2021-02-27	C879	30	Neg	Neg	Neg	1	Neg	Neg	1	Neg	C879
36	C880	P008		Beef		2021-02-27	C880	29	Neg	Neg	Neg	1	Neg	Neg	1	Neg	C880
									0	0	0	30	8	0	21	0

## Sheet: LPA
No	Sample	Note	cattle information			Date	Sample	PCV (23-33%)	PCR								Sample
									Babesia			Theileria			Anaplasma
			Age (year,month)	Species	District				Babesia spp.	B. bovis	B. bigemina	Theileria spp.	T. orientalis	T. anulata	A. marginale	A. phagocytophilum
1	C769	972		Dairy	MeaTha/ Lumpang	2021-02-24	C769	28	Neg	Neg	Neg	1	1	Neg	1	N/A	C769
2	C770	907		Dairy		2021-02-24	C770	24	Neg	Neg	Neg	1	Neg	Neg	1	N/A	C770
3	C771	03194	6	Dairy		2021-02-24	C771	26	Neg	Neg	Neg	1	Neg	Neg	1	N/A	C771
4	C772	924		Dairy		2021-02-24	C772	23	Neg	Neg	Neg	1	Neg	Neg	1	N/A	C772
5	C773	06986	5	Dairy		2021-02-24	C773	25	Neg	Neg	Neg	1	Neg	Neg	1	N/A	C773
6	C774	07992	5	Dairy		2021-02-24	C774	32	Neg	Neg	Neg	1	Neg	Neg	1	N/A	C774
7	C775	02196	5	Dairy		2021-02-24	C775	26	Neg	Neg	Neg	1	1	Neg	1	N/A	C775
8	C776	01986	6	Dairy		2021-02-24	C776	15	Neg	Neg	Neg	1	Neg	Neg	1	N/A	C776
9	C777	1006		Dairy		2021-02-24	C777	24	Neg	Neg	Neg	1	Neg	Neg	1	N/A	C777
10	C778	01786	6	Dairy		2021-02-24	C778	27	Neg	Neg	Neg	1	1	Neg	1	N/A	C778
11	C779	01992	5	Dairy		2021-02-24	C779	22	Neg	Neg	Neg	1	Neg	Neg	1	N/A	C779
12	C780	13105	4	Dairy		2021-02-24	C780	22	Neg	Neg	Neg	Neg	Neg	Neg	Neg	N/A	C780
13	C781	995		Dairy		2021-02-24	C781	30	Neg	Neg	Neg	1	Neg	Neg	1	N/A	C781
14	C782	06103	4	Dairy		2021-02-24	C782	23	Neg	Neg	Neg	1	Neg	Neg	1	N/A	C782
15	C783	08292	5	Dairy		2021-02-24	C783	29	Neg	Neg	Neg	1	Neg	Neg	1	N/A	C783
16	C784	965		Dairy		2021-02-24	C784	16	Neg	Neg	Neg	1	1	Neg	1	N/A	C784
17	C785	08196	5	Dairy		2021-02-24	C785	29	Neg	Neg	Neg	Neg	Neg	Neg	Neg	N/A	C785
18	C786	04396	5	Dairy		2021-02-24	C786	19	Neg	Neg	Neg	1	Neg	Neg	Neg	N/A	C786
19	C787	51186	6	Dairy		2021-02-24	C787	25	Neg	Neg	Neg	1	1	Neg	1	N/A	C787
20	C788	01192	5	Dairy		2021-02-24	C788	22	Neg	Neg	Neg	1	Neg	Neg	1	N/A	C788
21	C789	31207	4	Dairy		2021-02-24	C789	23	Neg	Neg	Neg	1	Neg	Neg	1	N/A	C789
22	C790	10291	5	Dairy		2021-02-24	C790	24	Neg	Neg	Neg	1	Neg	Neg	1	N/A	C790
23	C791	08986	6	Dairy		2021-02-24	C791	25	Neg	Neg	Neg	1	Neg	Neg	1	N/A	C791
24	C792	91097	5	Dairy		2021-02-24	C792	28	Neg	Neg	Neg	1	Neg	Neg	1	N/A	C792
25	C793	03881	5	Dairy		2021-02-24	C793	19	Neg	Neg	Neg	1	Neg	Neg	1	N/A	C793
26	C794	08992	5	Dairy		2021-02-24	C794	18	Neg	Neg	Neg	Neg	Neg	Neg	Neg	N/A	C794
27	C795	02396	5	Dairy		2021-02-24	C795	21	Neg	Neg	Neg	1	1	Neg	1	N/A	C795
28	C796	11093	5	Dairy		2021-02-24	C796	26	Neg	Neg	Neg	Neg	Neg	Neg	Neg	N/A	C796
29	C797	01594	5	Dairy		2021-02-24	C797	24	Neg	Neg	Neg	1	Neg	Neg	1	N/A	C797
30	C798	04898	5	Dairy		2021-02-24	C798	23	Neg	Neg	Neg	1	Neg	Neg	1	N/A	C798
31	C799	05296	5	Dairy		2021-02-24	C799	26	Neg	Neg	Neg	Neg	Neg	Neg	1	N/A	C799
32	C800	02986	6	Dairy		2021-02-24	C800	24	Neg	Neg	Neg	1	Neg	Neg	1	N/A	C800
33	C801	02386	6	Dairy		2021-02-24	C801	24	Neg	Neg	Neg	1	1	Neg	1	N/A	C801
34	C802	06303	4	Dairy		2021-02-24	C802	22	Neg	Neg	Neg	1	Neg	Neg	1	N/A	C802
35	C803	01425	4	Dairy		2021-02-24	C803	22	Neg	Neg	Neg	1	Neg	Neg	1	N/A	C803
36	C804	04196	5	Dairy		2021-02-24	C804	29	Neg	Neg	Neg	1	Neg	Neg	1	N/A	C804
37	C805	01893	5	Dairy		2021-02-24	C805	24	Neg	Neg	Neg	1	Neg	Neg	Neg	N/A	C805
38	C806	793		Dairy		2021-02-24	C806	25	Neg	Neg	Neg	1	1	Neg	1	N/A	C806
39	C807	840		Dairy		2021-02-24	C807	28	Neg	Neg	Neg	Neg	Neg	Neg	1	N/A	C807
40	C808	71086	6	Dairy		2021-02-24	C808	24	Neg	Neg	Neg	1	Neg	Neg	1	N/A	C808
41	C809	01792	5	Dairy		2021-02-24	C809	24	Neg	Neg	Neg	1	Neg	Neg	1	N/A	C809
42	C810	885		Dairy		2021-02-24	C810	20	Neg	Neg	Neg	1	1	Neg	1	N/A	C810
43	C811	12103	4	Dairy		2021-02-24	C811	27	Neg	Neg	Neg	Neg	Neg	Neg	1	N/A	C811
44	C812	06408	4	Dairy		2021-02-24	C812	20	Neg	Neg	Neg	1	Neg	Neg	1	N/A	C812
45	C813	21107	4	Dairy		2021-02-24	C813	26	Neg	Neg	Neg	1	Neg	Neg	1	N/A	C813
46	C814	1005		Dairy		2021-02-24	C814	25	Neg	Neg	Neg	1	1	Neg	1	N/A	C814
47	C815	1002		Dairy		2021-02-24	C815	27	Neg	Neg	Neg	1	Neg	Neg	1	N/A	C815
48	C816	61082	6	Dairy		2021-02-24	C816	23	Neg	Neg	Neg	1	Neg	Neg	1	N/A	C816
49	C817	11284	6	Dairy		2021-02-24	C817	31	Neg	Neg	Neg	1	1	Neg	1	N/A	C817
50	C818	03492	5	Dairy		2021-02-24	C818	25	Neg	Neg	Neg	1	1	Neg	1	N/A	C818
51	C819	05993	5	Dairy		2021-02-24	C819	27	Neg	Neg	Neg	Neg	Neg	Neg	1	N/A	C819
52	C820	02286	6	Dairy		2021-02-24	C820	23	Neg	Neg	Neg	Neg	Neg	Neg	1	N/A	C820
53	C821	831		Dairy		2021-02-24	C821	34	Neg	Neg	Neg	1	1	Neg	1	N/A	C821
54	C822	1105	4	Dairy		2021-02-24	C822	23	Neg	Neg	Neg	1	Neg	Neg	1	N/A	C822
55	C823	04292	5	Dairy		2021-02-24	C823	26	Neg	Neg	Neg	1	Neg	Neg	1	N/A	C823
56	C824	41193	5	Dairy		2021-02-24	C824	26	Neg	Neg	Neg	1	Neg	Neg	1	N/A	C824
57	C825	08308	4	Dairy		2021-02-24	C825	24	Neg	Neg	Neg	1	Neg	Neg	1	N/A	C825
58	C826	15102	4	Dairy		2021-02-24	C826	20	Neg	Neg	Neg	1	Neg	Neg	1	N/A	C826
59	C827	10693	5	Dairy		2021-02-24	C827	22	Neg	Neg	Neg	1	Neg	Neg	1	N/A	C827
60	C828	58		Dairy		2021-02-24	C828	30	Neg	Neg	Neg	Neg	Neg	Neg	1	N/A	C828
61	C829	01817	0,6	Dairy		2021-02-24	C829	24	Neg	Neg	Neg	1	Neg	Neg	1	N/A	C829
62	C830	21102	4	Dairy		2021-02-24	C830	27	Neg	Neg	Neg	1	Neg	Neg	1	N/A	C830
63	C831	04117	3	Dairy		2021-02-24	C831	29	Neg	Neg	Neg	1	Neg	Neg	1	N/A	C831
64	C832	05303	4	Dairy		2021-02-24	C832	30	Neg	Neg	Neg	Neg	Neg	Neg	1	N/A	C832
65	C833	65	4	Dairy		2021-02-24	C833	25	Neg	Neg	Neg	1	Neg	Neg	1	N/A	C833
66	C834	04103		Dairy		2021-02-24	C834	25	Neg	Neg	Neg	1	Neg	Neg	1	N/A	C834
67	C835	11219	3	Dairy		2021-02-24	C835	30	1	1	Neg	1	Neg	Neg	1	N/A	C835
68	C836	03127	2	Dairy		2021-02-24	C836	26	Neg	Neg	Neg	1	Neg	Neg	Neg	N/A	C836
69	C837	02127	2	Dairy		2021-02-24	C837	21	Neg	Neg	Neg	1	Neg	Neg	1	N/A	C837
70	C838	03315	3	Dairy		2021-02-24	C838	26	Neg	Neg	Neg	1	1	Neg	1	N/A	C838
71	C839	01122	2	Dairy		2021-02-24	C839	20	1	1	Neg	1	1	Neg	1	N/A	C839
72	C840	01425	2	Dairy		2021-02-24	C840	31	Neg	Neg	Neg	1	Neg	Neg	1	N/A	C840
73	C841	04129	2	Dairy		2021-02-24	C841	29	Neg	Neg	Neg	1	Neg	Neg	1	N/A	C841
74	C842	02829	2	Dairy		2021-02-24	C842	24	Neg	Neg	Neg	1	Neg	Neg	1	N/A	C842
75	C843	01829	2	Dairy		2021-02-24	C843	27	1	1	Neg	1	Neg	Neg	1	N/A	C843
76	C844	03227	2	Dairy		2021-02-24	C844	22	1	1	Neg	1	1	Neg	1	N/A	C844
									4	4	0	65	16	0	69

## Sheet: LPU5
No	Sample	Note	cattle information			Date	Sample	PCV (23-33%)	PCR								Sample
									Babesia			Theileria			Anaplasma
			Age (year,month)	Species	District				Babesia spp.	B. bovis	B. bigemina	Theileria spp.	T. orientalis	T. anulata	A. marginale	A. phagocytophilum
1	C641	No.1	3 years	Beef	Li/Lumphun	2021-02-04	C641	37	Neg	Neg	Neg	1	Neg	Neg	1	Neg	C641
2	C642	No.2	3 years	Beef		2021-02-04	C642	26	Neg	Neg	Neg	1	Neg	Neg	1	Neg	C642
3	C643	No.3	3 years	Beef		2021-02-04	C643	15	Neg	Neg	Neg	1	Neg	Neg	1	Neg	C643
4	C644	No.4	3 years	Beef		2021-02-04	C644	33	Neg	Neg	Neg	1	Neg	Neg	1	Neg	C644
5	C645	No.5	3 years	Beef		2021-02-04	C645	24	Neg	Neg	Neg	1	Neg	Neg	1	Neg	C645
6	C646	No.6	3 years	Beef		2021-02-04	C646	15	Neg	Neg	Neg	1	Neg	Neg	1	Neg	C646
7	C647	No.7	3 years	Beef		2021-02-04	C647	26	Neg	Neg	Neg	1	Neg	Neg	1	Neg	C647
8	C648	No.8	3 years	Beef		2021-02-04	C648	23	Neg	Neg	Neg	1	Neg	Neg	1	Neg	C648
9	C649	No.9	5 years	Beef		2021-02-04	C649	24	Neg	Neg	Neg	1	Neg	Neg	1	Neg	C649
10	C650	No.10	4 years	Beef		2021-02-04	C650	38	Neg	Neg	Neg	1	Neg	Neg	1	Neg	C650
11	C651	No.11	2 years	Beef		2021-02-04	C651	37	Neg	Neg	Neg	Neg	Neg	Neg	1	Neg	C651
12	C652	No.12	3 years	Beef		2021-02-04	C652	26	Neg	Neg	Neg	1	Neg	Neg	1	Neg	C652
13	C653	No.13	3 years	Beef		2021-02-04	C653	34	Neg	Neg	Neg	1	Neg	Neg	1	Neg	C653
14	C654	No.14	5 years	Beef		2021-02-04	C654	27	Neg	Neg	Neg	1	Neg	Neg	1	Neg	C654
15	C655	No.15	3 years	Beef		2021-02-04	C655	29	Neg	Neg	Neg	1	Neg	Neg	1	Neg	C655
16	C656	No.16	3 years	Beef		2021-02-04	C656	19	Neg	Neg	Neg	1	Neg	Neg	1	Neg	C656
17	C657	No.17	3 years	Beef		2021-02-04	C657	22	Neg	Neg	Neg	1	Neg	Neg	1	Neg	C657
18	C658	No.18	3 years	Beef		2021-02-04	C658	31	Neg	Neg	Neg	1	Neg	Neg	1	Neg	C658
19	C659	No.19	3 years	Beef		2021-02-04	C659	10	Neg	Neg	Neg	1	Neg	Neg	1	Neg	C659
20	C660	No.20 ตัวผู้	2 years	Beef		2021-02-04	C660	25	Neg	Neg	Neg	Neg	Neg	Neg	Neg	Neg	C660
21	C661	No.21	5 years	Beef		2021-02-04	C661	30	Neg	Neg	Neg	1	Neg	Neg	1	Neg	C661
22	C662	No.22	3 years	Beef		2021-02-04	C662	23	Neg	Neg	Neg	1	Neg	Neg	1	Neg	C662
23	C663	No.23	3 years	Beef		2021-02-04	C663	32	Neg	Neg	Neg	1	Neg	Neg	1	Neg	C663
24	C664	No.24	1 years	Beef		2021-02-04	C664	31	Neg	Neg	Neg	Neg	Neg	Neg	Neg	Neg	C664
25	C665	No.25	2 years	Beef		2021-02-04	C665	31	Neg	Neg	Neg	Neg	Neg	Neg	Neg	Neg	C665
26	C666	No.26	3 years	Beef		2021-02-04	C666	31	Neg	Neg	Neg	1	Neg	Neg	1	Neg	C666
27	C667	No.27	3 years	Beef		2021-02-04	C667	24	Neg	Neg	Neg	1	Neg	Neg	1	Neg	C667
28	C668	No.28	4 years	Beef		2021-02-04	C668	22	Neg	Neg	Neg	1	Neg	Neg	1	Neg	C668
29	C669	No.29	5 years	Beef		2021-02-04	C669	26	Neg	Neg	Neg	1	Neg	Neg	1	Neg	C669
30	C670	No.30	1 years	Beef		2021-02-04	C670	25	Neg	Neg	Neg	1	Neg	Neg	1	Neg	C670
31	C671	No.31 ตัวผู้	2 years	Beef		2021-02-04	C671	22	Neg	Neg	Neg	1	Neg	Neg	1	Neg	C671
32	C672	No.32	5 years	Beef		2021-02-04	C672	20	Neg	Neg	Neg	1	Neg	Neg	1	Neg	C672
33	C673	No.33	3 years	Beef		2021-02-04	C673	28	Neg	Neg	Neg	1	Neg	Neg	1	Neg	C673
34	C674	No.34	5 years	Beef		2021-02-04	C674	30	Neg	Neg	Neg	1	Neg	Neg	Neg	Neg	C674
35	C675	No.35	5 years	Beef		2021-02-04	C675	25	Neg	Neg	Neg	1	Neg	Neg	1	Neg	C675
36	C676	No.36	1 years	Beef		2021-02-04	C676	32	Neg	Neg	Neg	1	Neg	Neg	1	Neg	C676
37	C677	No.37	5 years	Beef		2021-02-04	C677	17	Neg	Neg	Neg	1	Neg	Neg	Neg	Neg	C677
38	C678	No.38	5 years	Beef		2021-02-04	C678	21	Neg	Neg	Neg	1	Neg	Neg	1	Neg	C678
39	C679	No.39	3 years	Beef		2021-02-04	C679	13	Neg	Neg	Neg	Neg	Neg	Neg	Neg	Neg	C679
40	C680	No.40	4 years	Beef		2021-02-04	C680	21	Neg	Neg	Neg	1	Neg	Neg	1	Neg	C680
41	C681	No.41	4 years	Beef		2021-02-04	C681	26	Neg	Neg	Neg	1	Neg	Neg	1	Neg	C681
42	C682	No.42	3 years	Beef		2021-02-04	C682	27	Neg	Neg	Neg	1	Neg	Neg	1	Neg	C682
43	C683	No.43	4 years	Beef		2021-02-04	C683	26	Neg	Neg	Neg	1	Neg	Neg	1	Neg	C683
44	C684	No.44	5 years	Beef		2021-02-04	C684	30	Neg	Neg	Neg	1	Neg	Neg	1	Neg	C684
45	C685	No.45	5 years	Beef		2021-02-04	C685	29	Neg	Neg	Neg	1	Neg	Neg	1	Neg	C685
46	C686	No.46	5 years	Beef		2021-02-04	C686	26	Neg	Neg	Neg	1	Neg	Neg	1	Neg	C686
47	C687	No.47	5 years	Beef		2021-02-04	C687	26	Neg	Neg	Neg	1	Neg	Neg	1	Neg	C687
48	C688	No.48	1 years	Beef		2021-02-04	C688	30	Neg	Neg	Neg	1	Neg	Neg	1	Neg	C688
49	C689	No.49	2 years	Beef		2021-02-04	C689	30	Neg	Neg	Neg	1	Neg	Neg	1	Neg	C689
50	C690	No.50	3 years	Beef		2021-02-04	C690	21	Neg	Neg	Neg	Neg	Neg	Neg	1	Neg	C690
51	C691	No.51	2 years	Beef		2021-02-04	C691	24	Neg	Neg	Neg	Neg	Neg	Neg	Neg	Neg	C691
52	C692	No.52	2 years	Beef		2021-02-04	C692	30	Neg	Neg	Neg	1	Neg	Neg	Neg	Neg	C692
53	C693	No.53	3 years	Beef		2021-02-04	C693	23	Neg	Neg	Neg	1	Neg	Neg	Neg	Neg	C693
54	C694	No.54	3 years	Beef		2021-02-04	C694	27	Neg	Neg	Neg	Neg	Neg	Neg	Neg	Neg	C694
55	C695	No.55	3 years	Beef		2021-02-04	C695	19	Neg	Neg	Neg	Neg	Neg	Neg	Neg	Neg	C695
56	C696	No.56	2 years	Beef		2021-02-04	C696	25	Neg	Neg	Neg	1	Neg	Neg	Neg	Neg	C696
57	C697	No.57	1 years	Beef		2021-02-04	C697	33	Neg	Neg	Neg	1	Neg	Neg	Neg	Neg	C697
58	C698	No.58	3 years	Beef		2021-02-04	C698	29	Neg	Neg	Neg	1	Neg	Neg	Neg	Neg	C698
59	C699	No.59	3 years	Beef		2021-02-04	C699	29	Neg	Neg	Neg	1	Neg	Neg	Neg	Neg	C699
60	C700	No.60	1 years	Beef		2021-02-04	C700	30	Neg	Neg	Neg	1	Neg	Neg	Neg	Neg	C700
61	C701	No.61	1 years	Beef		2021-02-04	C701	33	Neg	Neg	Neg	Neg	Neg	Neg	Neg	Neg	C701
62	C702	No.62	2 years	Beef		2021-02-04	C702	24	Neg	Neg	Neg	1	Neg	Neg	1	Neg	C702
63	C703	No.63	3 years	Beef		2021-02-05	C703	38	Neg	Neg	Neg	1	Neg	Neg	1	Neg	C703
64	C704	No.64	2 years	Beef		2021-02-05	C704	36	Neg	Neg	Neg	1	Neg	Neg	1	Neg	C704
65	C705	No.65	3 years	Beef		2021-02-05	C705	28	Neg	Neg	Neg	1	Neg	Neg	1	Neg	C705
66	C706	No.66	3 years	Beef		2021-02-05	C706	31	Neg	Neg	Neg	1	Neg	Neg	1	Neg	C706
67	C707	No.67	3 years	Beef		2021-02-05	C707	38	Neg	Neg	Neg	1	Neg	Neg	1	Neg	C707
68	C708	No.68	3 years	Beef		2021-02-05	C708	28	Neg	Neg	Neg	Neg	Neg	Neg	1	Neg	C708
69	C709	No.69	3 years	Beef		2021-02-05	C709	27	Neg	Neg	Neg	1	Neg	Neg	1	Neg	C709
70	C710	No.70	3 years	Beef		2021-02-05	C710	20	Neg	Neg	Neg	1	Neg	Neg	1	Neg	C710
71	C711	No.71	3 years	Beef		2021-02-05	C711	18	Neg	Neg	Neg	1	Neg	Neg	1	Neg	C711
72	C712	No.72	3 years	Beef		2021-02-05	C712	27	Neg	Neg	Neg	1	Neg	Neg	1	Neg	C712
73	C713	No.73	3 years	Beef		2021-02-05	C713	27	Neg	Neg	Neg	1	Neg	Neg	1	Neg	C713
74	C714	No.74	3 years	Beef		2021-02-05	C714	18	Neg	Neg	Neg	1	Neg	Neg	1	Neg	C714
75	C715	No.75	3 years	Beef		2021-02-05	C715	30	Neg	Neg	Neg	1	Neg	Neg	1	Neg	C715
76	C716	No.76	4 years	Beef		2021-02-05	C716	28	Neg	Neg	Neg	1	Neg	Neg	1	Neg	C716
77	C717	No.77	2 years	Beef		2021-02-05	C717	28	Neg	Neg	Neg	1	Neg	Neg	1	Neg	C717
78	C718	No.78	2 years	Beef		2021-02-05	C718	24	Neg	Neg	Neg	Neg	Neg	Neg	Neg	Neg	C718
79	C719	No.79	2 years	Beef		2021-02-05	C719	26	Neg	Neg	Neg	Neg	Neg	Neg	1	Neg	C719
80	C720	No.80	1 years	Beef		2021-02-05	C720	30	Neg	Neg	Neg	Neg	Neg	Neg	1	Neg	C720
81	C721	No.81	2 years	Beef		2021-02-05	C721	26	Neg	Neg	Neg	Neg	Neg	Neg	1	Neg	C721
82	C722	No.82	1 years	Beef		2021-02-05	C722	22	Neg	Neg	Neg	Neg	Neg	Neg	Neg	Neg	C722
83	C723	No.83	2 years	Beef		2021-02-05	C723	22	Neg	Neg	Neg	Neg	Neg	Neg	1	Neg	C723
84	C724	No.84	2 years	Beef		2021-02-05	C724	29	Neg	Neg	Neg	1	Neg	Neg	1	Neg	C724
85	C725	No.85	2 years	Beef		2021-02-05	C725	33	Neg	Neg	Neg	1	Neg	Neg	1	Neg	C725
86	C726	No.86	2 years	Beef		2021-02-05	C726	23	Neg	Neg	Neg	Neg	Neg	Neg	1	Neg	C726
87	C727	No.87	2 years	Beef		2021-02-05	C727	36	Neg	Neg	Neg	1	Neg	Neg	1	Neg	C727
88	C728	No.88	1 years	Beef		2021-02-05	C728	28	Neg	Neg	Neg	Neg	Neg	Neg	Neg	Neg	C728
89	C729	No.89	2 years	Beef		2021-02-05	C729	20	Neg	Neg	Neg	1	Neg	Neg	Neg	Neg	C729
90	C730	No.90	2 years	Beef		2021-02-05	C730	21	Neg	Neg	Neg	1	Neg	Neg	1	Neg	C730
91	C731	No.91	2 years	Beef		2021-02-05	C731	29	Neg	Neg	Neg	1	Neg	Neg	Neg	Neg	C731
92	C732	No.92	3 years	Beef		2021-02-05	C732	37	Neg	Neg	Neg	1	Neg	Neg	Neg	Neg	C732
93	C733	No.93	2 years	Beef		2021-02-05	C733	23	Neg	Neg	Neg	1	Neg	Neg	1	Neg	C733
94	C734	No.94	2 years	Beef		2021-02-05	C734	28	Neg	Neg	Neg	1	Neg	Neg	1	Neg	C734
95	C735	No.95	3 years	Beef		2021-02-05	C735	26	Neg	Neg	Neg	1	Neg	Neg	1	Neg	C735
96	C736	No.96	3 years	Beef		2021-02-05	C736	30	Neg	Neg	Neg	Neg	Neg	Neg	1	Neg	C736
97	C737	No.97 ตัวผู้	2 years	Beef		2021-02-05	C737	26	Neg	Neg	Neg	1	1	Neg	1	Neg	C737
98	C738	No.98	3 years	Beef		2021-02-05	C738	12	Neg	Neg	Neg	1	1	Neg	1	Neg	C738
99	C739	No.99	3 years	Beef		2021-02-05	C739	27	Neg	Neg	Neg	1	1	Neg	1	Neg	C739
100	C740	No.100	1 years	Beef		2021-02-05	C740	30	Neg	Neg	Neg	1	1	Neg	1	Neg	C740
101	C741	No.101	1 years	Beef		2021-02-05	C741	26	Neg	Neg	Neg	Neg	Neg	Neg	1	Neg	C741
102	C742	No.102	2 years	Beef		2021-02-05	C742	30	Neg	Neg	Neg	1	Neg	Neg	Neg	Neg	C742
103	C743	No.103	2 years	Beef		2021-02-05	C743	30	Neg	Neg	Neg	1	1	Neg	1	Neg	C743
104	C744	No.104	1 years	Beef		2021-02-05	C744	36	Neg	Neg	Neg	Neg	Neg	Neg	1	Neg	C744
105	C745	No.105	1 years	Beef		2021-02-05	C745	28	Neg	Neg	Neg	1	Neg	Neg	1	Neg	C745
106	C746	No.106	1 years	Beef		2021-02-05	C746	34	Neg	Neg	Neg	1	1	Neg	1	Neg	C746
107	C747	No.107	2 years	Beef		2021-02-05	C747	27	Neg	Neg	Neg	1	1	Neg	1	Neg	C747
108	C748	No.108	1 years	Beef		2021-02-05	C748	36	Neg	Neg	Neg	1	Neg	Neg	1	Neg	C748
109	C749	No.109	1 years	Beef		2021-02-05	C749	34	Neg	Neg	Neg	1	Neg	Neg	1	Neg	C749
110	C750	No.110	2 years	Beef		2021-02-05	C750	32	Neg	Neg	Neg	Neg	Neg	Neg	1	Neg	C750
111	C751	No.111	3 years	Beef		2021-02-05	C751	24	Neg	Neg	Neg	1	Neg	Neg	1	Neg	C751
112	C752	No.112	3 years	Beef		2021-02-05	C752	33	Neg	Neg	Neg	1	Neg	Neg	1	Neg	C752
113	C753	No.113	2 years	Beef		2021-02-05	C753	26	Neg	Neg	Neg	1	Neg	Neg	1	Neg	C753
114	C754	No.114	2 years	Beef		2021-02-05	C754	28	Neg	Neg	Neg	1	Neg	Neg	1	Neg	C754
115	C755	No.115	2 years	Beef		2021-02-05	C755	25	Neg	Neg	Neg	1	Neg	Neg	1	Neg	C755
116	C756	No.116	2 years	Beef		2021-02-05	C756	24	Neg	Neg	Neg	1	Neg	Neg	Neg	Neg	C756
117	C757	No.117	2 years	Beef		2021-02-05	C757	28	Neg	Neg	Neg	1	Neg	Neg	1	Neg	C757
118	C758	No.118 ตัวผู้	2 years	Beef		2021-02-05	C758	26	Neg	Neg	Neg	1	Neg	Neg	1	Neg	C758
119	C759	No.119	2 years	Beef		2021-02-05	C759	29	Neg	Neg	Neg	1	Neg	Neg	Neg	Neg	C759
120	C760	No.120	2 years	Beef		2021-02-05	C760	17	Neg	Neg	Neg	Neg	Neg	Neg	1	Neg	C760
121	C761	No.121	2 years	Beef		2021-02-05	C761	23	Neg	Neg	Neg	Neg	Neg	Neg	Neg	Neg	C761
122	C762	No.122	2 years	Beef		2021-02-05	C762	20	Neg	Neg	Neg	Neg	Neg	Neg	1	Neg	C762
123	C763	No.123	2 years	Beef		2021-02-05	C763	20	Neg	Neg	Neg	1	Neg	Neg	1	Neg	C763
124	C764	No.124	1 years	Beef		2021-02-05	C764	23	Neg	Neg	Neg	1	Neg	Neg	Neg	Neg	C764
125	C765	No.125	2 years	Beef		2021-02-05	C765	25	Neg	Neg	Neg	1	Neg	Neg	1	Neg	C765
126	C766	No.126	1 years	Beef		2021-02-05	C766	22	Neg	Neg	Neg	Neg	Neg	Neg	Neg	Neg	C766
127	C767	No.127	2 years	Beef		2021-02-05	C767	24	Neg	Neg	Neg	1	Neg	Neg	1	Neg	C767
128	C768	No.128	2 years	Beef		2021-02-05	C768	32	Neg	Neg	Neg	1	Neg	Neg	1	Neg	C768
												101	7	0	99

## Sheet: CM4
No	Sample	Note	cattle information			Date	Sample	PCV (23-33%)	PCR								Sample
									Babesia			Theileria			Anaplasma
			Age (year,month)	Species	District				Babesia spp.	B. bovis	B. bigemina	Theileria spp.	T. orientalis	T. anulata	A. marginale	A. phagocytophilum
1	C599	ข้าวเม่า		Dairy	Doi Lor/ Chiang Mai	2020-12-22	C599	31	Neg	Neg	Neg	Neg	Neg	Neg	Neg	Neg	C599
2	C600	โสพิศ		Dairy		2020-12-22	C600	33	Neg	Neg	Neg	Neg	Neg	Neg	Neg	Neg	C600
3	C601	จิ๊บ		Dairy		2020-12-22	C601	28	Neg	Neg	Neg	Neg	Neg	Neg	Neg	Neg	C601
4	C602	กีตาร์		Dairy		2020-12-22	C602	33	Neg	Neg	Neg	Neg	Neg	Neg	Neg	Neg	C602
5	C603	เอ้ย		Dairy		2020-12-22	C603	33	Neg	Neg	Neg	Neg	Neg	Neg	Neg	Neg	C603
6	C604	เก้า		Dairy		2020-12-22	C604	32	Neg	Neg	Neg	Neg	Neg	Neg	Neg	Neg	C604
7	C605	ยี่โถ		Dairy		2020-12-22	C605	30	Neg	Neg	Neg	Neg	Neg	Neg	Neg	Neg	C605
8	C606	แสงดาว		Dairy		2020-12-22	C606	40	Neg	Neg	Neg	Neg	Neg	Neg	Neg	Neg	C606
9	C607	นิตา		Dairy		2020-12-22	C607	33	Neg	Neg	Neg	Neg	Neg	Neg	Neg	Neg	C607
10	C608	จุ๊บ		Dairy		2020-12-22	C608	30	Neg	Neg	Neg	Neg	Neg	Neg	Neg	Neg	C608
11	C609	เอ		Dairy		2020-12-22	C609	30	Neg	Neg	Neg	Neg	Neg	Neg	Neg	Neg	C609
12	C610	ดวง		Dairy		2020-12-22	C610	32	Neg	Neg	Neg	Neg	Neg	Neg	Neg	Neg	C610
13	C611	มะเหมี่ยว		Dairy		2020-12-22	C611	28	Neg	Neg	Neg	Neg	Neg	Neg	Neg	Neg	C611
14	C612	ชีวา		Dairy		2020-12-22	C612	32	Neg	Neg	Neg	Neg	Neg	Neg	Neg	Neg	C612
15	C613	ภูผา		Dairy		2020-12-22	C613	28	Neg	Neg	Neg	Neg	Neg	Neg	Neg	Neg	C613
16	C614	กาฟิวส์		Dairy		2020-12-22	C614	31	Neg	Neg	Neg	Neg	Neg	Neg	Neg	Neg	C614
17	C615	เงาะ		Dairy		2020-12-22	C615	34	Neg	Neg	Neg	Neg	Neg	Neg	Neg	Neg	C615
18	C616	พอใจ		Dairy		2020-12-22	C616	25	Neg	Neg	Neg	Neg	Neg	Neg	Neg	Neg	C616
19	C617	สีขาว		Dairy		2020-12-22	C617	29	Neg	Neg	Neg	Neg	Neg	Neg	Neg	Neg	C617
20	C618	ผู้หน้าสามเหลี่ยม NO.1		Dairy	Doi Lor/ Chiang Mai	2020-12-22	C618	38	Neg	Neg	Neg	Neg	Neg	Neg	Neg	Neg	C618
21	C619	เปียกปูน NO.2		Dairy		2020-12-22	C619	29	Neg	Neg	Neg	Neg	Neg	Neg	Neg	Neg	C619
22	C620	ไอดิน NO.3		Dairy		2020-12-22	C620	35	Neg	Neg	Neg	Neg	Neg	Neg	Neg	Neg	C620
23	C621	ผู้ดำขาขาว NO.4		Dairy		2020-12-22	C621	37	Neg	Neg	Neg	Pos	Pos	Neg	Neg	Neg	C621
24	C622	ไอน้ำ NO.5		Dairy		2020-12-22	C622	30	Neg	Neg	Neg	Neg	Neg	Neg	Neg	Neg	C622
25	C623	ผู้ลายจุด NO.6		Dairy		2020-12-22	C623	32	Neg	Neg	Neg	Neg	Neg	Neg	Neg	Neg	C623
26	C624	ผู้น้ำตาล NO.7		Dairy		2020-12-22	C624	31	Neg	Neg	Neg	Neg	Neg	Neg	Neg	Neg	C624
27	C625	ตาขาว		Dairy		2020-12-22	C625	31	Neg	Neg	Neg	Neg	Neg	Neg	Neg	Neg	C625
28	C626	ผู้มีปีก		Dairy		2020-12-22	C626	36	Neg	Neg	Neg	Neg	Neg	Neg	Neg	Neg	C626
29	C627	ผู้หลังหูด		Dairy		2020-12-22	C627	30	Neg	Neg	Neg	Neg	Neg	Neg	Neg	Neg	C627
30	C628	ผู้หน้าสามเหลี่ยมคอก 2		Dairy		2020-12-22	C628	36	Neg	Neg	Neg	Pos	Pos	Neg	Neg	Neg	C628
31	C629	เมียตูดขาว		Dairy		2020-12-22	C629	28	Neg	Neg	Neg	Neg	Neg	Neg	Neg	Neg	C629
32	C630	ผู้สีขาว		Dairy		2020-12-22	C630	30	Neg	Neg	Neg	Neg	Neg	Neg	Neg	Neg	C630
33	C631	ผู้น้ำตาลผสม		Dairy		2020-12-22	C631	42	Neg	Neg	Neg	Neg	Neg	Neg	Neg	Neg	C631
34	C632	เมียแพนด้าใหญ่		Dairy		2020-12-22	C632	32	Neg	Neg	Neg	Neg	Neg	Neg	Neg	Neg	C632
35	C633	ขาว No.21		Dairy		2020-12-22	C633	34	Neg	Neg	Neg	Neg	Neg	Neg	Neg	Neg	C633
36	C634	หน้าขน-ผมตั้ง No.24		Dairy		2020-12-22	C634	30	Neg	Neg	Neg	Neg	Neg	Neg	Neg	Neg	C634
37	C635	ดำมีขน No.22		Dairy		2020-12-22	C635	33	Neg	Neg	Neg	Neg	Neg	Neg	Neg	Neg	C635
38	C636	ขาวน้ำตาล No.25	*ฉี่แดง	Dairy		2020-12-22	C636	33	Neg	Neg	Neg	Pos	Pos	Neg	Neg	Neg	C636
39	C637	ดำ No.23		Dairy		2020-12-22	C637	30	Neg	Neg	Neg	Neg	Neg	Neg	Pos	Neg	C637
40	C638	มีผม-หน้าหัวใจ No.20		Dairy		2020-12-22	C638	30	Neg	Neg	Neg	Neg	Neg	Neg	Neg	Neg	C638
41	C639	จมูกด่าง No.19		Dairy		2020-12-22	C639	32	Neg	Neg	Neg	Neg	Neg	Neg	Neg	Neg	C639
42	C640	ดำเนื้อ No.26		Dairy		2020-12-22	C640	44	Neg	Neg	Neg	Pos	Pos	Neg	Neg	Neg	C640
												4	4		1

## Sheet: CR
No	Sample	Note	cattle information			Date	Sample	PCV (23-33%)	PCR								Sample
									Babesia			Theileria			Anaplasma
			Age (year,month)	Species	District				Babesia spp.	B. bovis	B. bigemina	Theileria spp.	T. orientalis	T. anulata	A. marginale	A. phagocytophilum
1	C512	ดาวเรือง	5 years	Dairy	Khuntan/ Chiang Rai	2020-11-25	C512	N/A	Neg	Neg	Neg	Neg	Neg	Neg	Neg	Neg	C512
2	C513	น้ำโค้ก	3 years	Dairy		2020-11-25	C513	N/A	Neg	Neg	Neg	Neg	Neg	Neg	Neg	Neg	C513
3	C514	แต้ม	4 years	Dairy		2020-11-25	C514	N/A	Neg	Neg	Neg	Neg	Neg	Neg	Neg	Neg	C514
4	C515	ถุงทอง	3 years	Dairy		2020-11-25	C515	N/A	Neg	Neg	Neg	Neg	Neg	Neg	Neg	Neg	C515
5	C516	ทองแท้	3 years	Dairy		2020-11-25	C516	N/A	Neg	Neg	Neg	Neg	Neg	Neg	Neg	Neg	C516
6	C517	ฟ้าใหม่	3 years	Dairy		2020-11-25	C517	N/A	Neg	Neg	Neg	Neg	Neg	Neg	Neg	Neg	C517
7	C518	พอใจ	4 years	Dairy		2020-11-25	C518	N/A	Neg	Neg	Neg	Neg	Neg	Neg	Neg	Neg	C518
8	C519	ทองคำ	6 years	Dairy		2020-11-25	C519	N/A	Neg	Neg	Neg	Neg	Neg	Neg	Neg	Neg	C519
9	C520	ถุงทอง	3 years	Dairy		2020-11-25	C520	N/A	Neg	Neg	Neg	Neg	Neg	Neg	Neg	Neg	C520
10	C521	น้ำหนาว	2 years	Dairy		2020-11-25	C521	N/A	Neg	Neg	Neg	Neg	Neg	Neg	Neg	Neg	C521
11	C522	มินนี่	5 years	Dairy		2020-11-25	C522	N/A	Neg	Neg	Neg	Neg	Neg	Neg	Neg	Neg	C522
12	C523	บุญหลาย	6 years	Dairy		2020-11-25	C523	N/A	Neg	Neg	Neg	1	Neg	Neg	Neg	Neg	C523
13	C524	มิวนิก	3 years	Dairy		2020-11-25	C524	N/A	Neg	Neg	Neg	Neg	Neg	Neg	Neg	Neg	C524
14	C525	ปลายปี	3 years	Dairy		2020-11-25	C525	N/A	Neg	Neg	Neg	Neg	Neg	Neg	Neg	Neg	C525
15	C526	น้ำตาล	4 years	Dairy		2020-11-25	C526	N/A	Neg	Neg	Neg	Neg	Neg	Neg	Neg	Neg	C526
16	C527	หยก	3 years	Dairy		2020-11-25	C527	N/A	Neg	Neg	Neg	Neg	Neg	Neg	Neg	Neg	C527
17	C528	สิงหา	4 years	Dairy		2020-11-25	C528	N/A	Neg	Neg	Neg	Neg	Neg	Neg	Neg	Neg	C528
18	C529	ทองดี	3 years	Dairy		2020-11-25	C529	N/A	Neg	Neg	Neg	1	Neg	Neg	Neg	Neg	C529
19	C530	มุกดา	7 years	Dairy		2020-11-25	C530	N/A	Neg	Neg	Neg	1	Neg	Neg	Neg	Neg	C530
20	C531	ทับทิม	3 years	Dairy		2020-11-25	C531	N/A	Neg	Neg	Neg	Neg	Neg	Neg	1	Neg	C531
21	C532	มีนา	8 years	Dairy		2020-11-25	C532	N/A	Neg	Neg	Neg	1	1	Neg	Neg	Neg	C532
22	C533	สายป่าน	7 years	Dairy		2020-11-25	C533	N/A	Neg	Neg	Neg	Neg	Neg	Neg	Neg	Neg	C533
23	C534	มณี	3 years	Dairy		2020-11-25	C534	N/A	Neg	Neg	Neg	1	Neg	Neg	Neg	Neg	C534
24	C535	มะตูม	4 years	Dairy		2020-11-25	C535	N/A	Neg	Neg	Neg	Neg	Neg	Neg	Neg	Neg	C535
25	C536	โบว์	4 years	Dairy		2020-11-25	C536	N/A	Neg	Neg	Neg	Neg	Neg	Neg	Neg	Neg	C536
26	C537	โอปอล	3 years	Dairy		2020-11-25	C537	N/A	Neg	Neg	Neg	Neg	Neg	Neg	Neg	Neg	C537
27	C538	น้ำอ้อย	3 years	Dairy		2020-11-25	C538	N/A	Neg	Neg	Neg	Neg	Neg	Neg	1	Neg	C538
28	C539	ดอลลาร์	4 years	Dairy		2020-11-25	C539	N/A	Neg	Neg	Neg	Neg	Neg	Neg	Neg	Neg	C539
29	C540	แหวน	6 years	Dairy		2020-11-25	C540	N/A	Neg	Neg	Neg	Neg	Neg	Neg	Neg	Neg	C540
30	C541	ตุลา	3 years	Dairy		2020-11-25	C541	N/A	Neg	Neg	Neg	1	1	Neg	Neg	Neg	C541
31	C542	กุ้งนาง	3 years	Dairy		2020-11-25	C542	N/A	Neg	Neg	Neg	Neg	Neg	Neg	Neg	Neg	C542
32	C543	กฐิน	3 years	Dairy		2020-11-25	C543	N/A	Neg	Neg	Neg	Neg	Neg	Neg	Neg	Neg	C543
33	C544	ผักบุ้ง	3 years	Dairy		2020-11-25	C544	N/A	Neg	Neg	Neg	Neg	Neg	Neg	Neg	Neg	C544
34	C545	ดอกเฃ็ม	3 years	Dairy		2020-11-25	C545	N/A	Neg	Neg	Neg	Neg	Neg	Neg	Neg	Neg	C545
35	C546	ดาวเรือง	2 years	Dairy		2020-11-25	C546	N/A	Neg	Neg	Neg	Neg	Neg	Neg	Neg	Neg	C546
36	C547	นิ	1 years	Dairy		2020-11-25	C547	N/A	Neg	Neg	Neg	Neg	Neg	Neg	Neg	Neg	C547
37	C548	นำโชค	6 years	Dairy		2020-11-25	C548	N/A	Neg	Neg	Neg	Neg	Neg	Neg	Neg	Neg	C548
38	C549	ดอกพุทธ	3 years	Dairy		2020-11-25	C549	N/A	Neg	Neg	Neg	Neg	Neg	Neg	Neg	Neg	C549
39	C550	เมตตา	4 years	Dairy		2020-11-25	C550	N/A	Neg	Neg	Neg	Neg	Neg	Neg	Neg	Neg	C550
40	C551	บัวคำ	6 years	Dairy		2020-11-25	C551	N/A	Neg	Neg	Neg	Neg	Neg	Neg	Neg	Neg	C551
41	C552	อ้อน	6 years	Dairy		2020-11-25	C552	N/A	Neg	Neg	Neg	Neg	Neg	Neg	Neg	Neg	C552
42	C553	บัวคลี่	6 years	Dairy		2020-11-25	C553	N/A	Neg	Neg	Neg	Neg	Neg	Neg	Neg	Neg	C553
43	C554	กุหลาบ	8 years	Dairy		2020-11-25	C554	N/A	Neg	Neg	Neg	Neg	Neg	Neg	Neg	Neg	C554
44	C555	ขุนทอง	5 years	Dairy		2020-11-25	C555	N/A	Neg	Neg	Neg	Neg	Neg	Neg	Neg	Neg	C555
45	C556	ดอกรัก	3 years	Dairy		2020-11-25	C556	N/A	Neg	Neg	Neg	Neg	Neg	Neg	Neg	Neg	C556
46	C557	โย่งขาว	4 years	Dairy		2020-11-25	C557	N/A	Neg	Neg	Neg	Neg	Neg	Neg	Neg	Neg	C557
47	C558	ฟ้าลั่น	2 years	Dairy		2020-11-25	C558	N/A	Neg	Neg	Neg	Neg	Neg	Neg	Neg	Neg	C558
48	C559	แฟนต้า	1 year	Dairy		2020-11-25	C559	N/A	Neg	Neg	Neg	Neg	Neg	Neg	Neg	Neg	C559
49	C560	น้ำตาล	1 year	Dairy		2020-11-25	C560	N/A	Neg	Neg	Neg	Neg	Neg	Neg	Neg	Neg	C560
50	C561	แบม	1 year	Dairy		2020-11-25	C561	N/A	Neg	Neg	Neg	Neg	Neg	Neg	Neg	Neg	C561
51	C562	บัวเงิน	1 year	Dairy		2020-11-25	C562	N/A	Neg	Neg	Neg	Neg	Neg	Neg	Neg	Neg	C562
52	C563	เดือนแรม	1 year	Dairy		2020-11-25	C563	N/A	Neg	Neg	Neg	Neg	Neg	Neg	Neg	Neg	C563
53	C564	ใบบัว	1 year	Dairy		2020-11-25	C564	N/A	Neg	Neg	Neg	Neg	Neg	Neg	Neg	Neg	C564
54	C565	ราตรี	1 year	Dairy		2020-11-25	C565	N/A	Neg	Neg	Neg	Neg	Neg	Neg	Neg	Neg	C565
55	C566	ตุ่น	1 year	Dairy		2020-11-25	C566	N/A	Neg	Neg	Neg	Neg	Neg	Neg	Neg	Neg	C566
56	C567	นะโม	1 year	Dairy		2020-11-25	C567	N/A	Neg	Neg	Neg	Neg	Neg	Neg	Neg	Neg	C567
57	C568	น้ำฝน	7 years	Dairy		2020-11-25	C568	N/A	Neg	Neg	Neg	Neg	Neg	Neg	Neg	Neg	C568
58	C569	สงกรานต์	5 years	Dairy		2020-11-25	C569	N/A	Neg	Neg	Neg	Neg	Neg	Neg	Neg	Neg	C569
59	C570	วันดี	6 years	Dairy		2020-11-25	C570	N/A	Neg	Neg	Neg	Neg	Neg	Neg	Neg	Neg	C570
60	C571	ขวัญ	3 years	Dairy		2020-11-25	C571	N/A	Neg	Neg	Neg	Neg	Neg	Neg	Neg	Neg	C571
61	C572	ดาวเรือง	3 years	Dairy		2020-11-25	C572	N/A	Neg	Neg	Neg	Neg	Neg	Neg	Neg	Neg	C572
62	C573	ฟาง	4 years	Dairy		2020-11-25	C573	N/A	Neg	Neg	Neg	Neg	Neg	Neg	Neg	Neg	C573
63	C574	น้ำหวาน	2 years	Dairy		2020-11-25	C574	N/A	Neg	Neg	Neg	Neg	Neg	Neg	Neg	Neg	C574
64	C575	วันเฉลิม	4 years	Dairy		2020-11-25	C575	N/A	Neg	Neg	Neg	Neg	Neg	Neg	Neg	Neg	C575
65	C576	นินงาม	4 years	Dairy		2020-11-25	C576	N/A	Neg	Neg	Neg	Neg	Neg	Neg	Neg	Neg	C576
66	C577	จ๋อมแจ๋ม	7 years	Dairy		2020-11-25	C577	N/A	Neg	Neg	Neg	Neg	Neg	Neg	Neg	Neg	C577
67	C578	บุญรอด	5 years	Dairy		2020-11-25	C578	N/A	Neg	Neg	Neg	Neg	Neg	Neg	Neg	Neg	C578
68	C579	ถุงเงิน	3 years	Dairy		2020-11-25	C579	N/A	Neg	Neg	Neg	Neg	Neg	Neg	Neg	Neg	C579
69	C580	พรรษา	4 months	Dairy		2020-11-25	C580	N/A	Neg	Neg	Neg	Neg	Neg	Neg	Neg	Neg	C580
70	C581	จอย	1 year	Dairy		2020-11-25	C581	N/A	Neg	Neg	Neg	Neg	Neg	Neg	Neg	Neg	C581
71	C582	บุญยืน	2 years	Dairy		2020-11-25	C582	N/A	Neg	Neg	Neg	Neg	Neg	Neg	Neg	Neg	C582
72	C583	นิก	1 year	Dairy		2020-11-25	C583	N/A	Neg	Neg	Neg	Neg	Neg	Neg	Neg	Neg	C583
73	C584	นุก	1 year	Dairy		2020-11-25	C584	N/A	Neg	Neg	Neg	Neg	Neg	Neg	Neg	Neg	C584
74	C585	ขนุน	1 year	Dairy		2020-11-25	C585	N/A	Neg	Neg	Neg	Neg	Neg	Neg	Neg	Neg	C585
75	C586	ดอกคูณ	1 year	Dairy		2020-11-25	C586	N/A	Neg	Neg	Neg	Neg	Neg	Neg	Neg	Neg	C586
76	C587	มังคุด	2 years	Dairy		2020-11-25	C587	N/A	Neg	Neg	Neg	Neg	Neg	Neg	Neg	Neg	C587
77	C588	ชบาแก้ว	1 year	Dairy		2020-11-25	C588	N/A	Neg	Neg	Neg	Neg	Neg	Neg	Neg	Neg	C588
78	C589	ปุยฝ้าย	1 year	Dairy		2020-11-25	C589	N/A	Neg	Neg	Neg	Neg	Neg	Neg	Neg	Neg	C589
79	C590	ใบเฟิร์น	1 year	Dairy		2020-11-25	C590	N/A	Neg	Neg	Neg	Neg	Neg	Neg	Neg	Neg	C590
80	C591	ทองคำ	4 months	Dairy		2020-11-25	C591	N/A	Neg	Neg	Neg	Neg	Neg	Neg	Neg	Neg	C591
81	C592	อัญชัน (ฉี่แดง)	1 year	Dairy		2020-11-25	C592	N/A	Neg	Neg	Neg	Neg	Neg	Neg	Neg	Neg	C592
82	C593	ขาวเขากิ	5 years	Beef		2020-11-26	C593	N/A	Neg	Neg	Neg	Neg	Neg	Neg	Neg	Neg	C593
83	C594	นวล	5 years	Beef		2020-11-26	C594	N/A	Neg	Neg	Neg	Neg	Neg	Neg	Neg	Neg	C594
84	C595	สีนวลเขาโค้ง (จิ๋มบวม)	6 years	Beef		2020-11-26	C595	N/A	Neg	Neg	Neg	Neg	Neg	Neg	Neg	Neg	C595
85	C596	ขาวหัวเทา	10 years	Beef		2020-11-26	C596	N/A	Neg	Neg	Neg	Neg	Neg	Neg	Neg	Neg	C596
86	C597	สำลี	4 years	Beef		2020-11-26	C597	N/A	Neg	Neg	Neg	Neg	Neg	Neg	Neg	Neg	C597
87	C598	อาทิตย์	2 years	Beef		2020-11-26	C598	N/A	Neg	Neg	Neg	Neg	Neg	Neg	Neg	Neg	C598
										0	0	6	2	0	2

## Sheet: LPU4
No	Sample	Note	cattle information			Date	Sample	PCV (23-33%)	PCR								Sample
									Babesia			Theileria			Anaplasma
			Age (year,month)	Species	District				Babesia spp.	B. bovis	B. bigemina	Theileria spp.	T. orientalis	T. anulata	A. marginale	A. phagocytophilum
1	C468	11		Dairy	BanThi/Lamphun	2020-10-28	C468	31	Neg	Neg	Neg	Neg	Neg	Neg	Neg	Neg	C468
2	C469	9		Dairy		2020-10-28	C469	28	Neg	Neg	Neg	Neg	Neg	Neg	Neg	Neg	C469
3	C470	98		Dairy		2020-10-28	C470	23	Neg	Neg	Neg	1	1	Neg	Neg	Neg	C470
4	C471	9/2		Dairy		2020-10-28	C471	25	Neg	Neg	Neg	1	Neg	Neg	Neg	Neg	C471
5	C472	115		Dairy		2020-10-28	C472	21	Neg	Neg	Neg	1	1	Neg	Neg	Neg	C472
6	C473	10		Dairy		2020-10-28	C473	25	Neg	Neg	Neg	Neg	Neg	Neg	Neg	Neg	C473
7	C474	117		Dairy		2020-10-28	C474	29	Neg	Neg	Neg	1	1	Neg	Neg	Neg	C474
8	C475	5		Dairy		2020-10-28	C475	28	Neg	Neg	Neg	Neg	Neg	Neg	Neg	Neg	C475
9	C476	3		Dairy		2020-10-28	C476	26	Neg	Neg	Neg	1	1	Neg	Neg	Neg	C476
10	C477	8		Dairy		2020-10-28	C477	30	Neg	Neg	Neg	1	1	Neg	Neg	Neg	C477
11	C478	119		Dairy		2020-10-28	C478	13 clot	Neg	Neg	Neg	1	1	Neg	Neg	Neg	C478
12	C479	118		Dairy		2020-10-28	C479	28	Neg	Neg	Neg	1	1	Neg	Neg	Neg	C479
13	C480	T14		Dairy		2020-10-28	C480	19 clot	Neg	Neg	Neg	1	1	Neg	Neg	Neg	C480
14	C481	110		Dairy		2020-10-28	C481	29	Neg	Neg	Neg	1	1	Neg	Neg	Neg	C481
15	C482	T17		Dairy		2020-10-28	C482	29	Neg	Neg	Neg	1	1	Neg	Neg	Neg	C482
16	C483	913		Dairy		2020-10-28	C483	28	Neg	Neg	Neg	1	1	Neg	Neg	Neg	C483
17	C484	T11		Dairy		2020-10-28	C484	28	Neg	Neg	Neg	1	1	Neg	Neg	Neg	C484
18	C485	ดำ		Dairy		2020-10-28	C485	23	Neg	Neg	Neg	1	Neg	Neg	Neg	Neg	C485
19	C486	T16		Dairy		2020-10-28	C486	31	Neg	Neg	Neg	1	1	Neg	Neg	Neg	C486
20	C487	103		Dairy		2020-10-28	C487	23	Neg	Neg	Neg	1	Neg	Neg	Neg	Neg	C487
21	C488	212		Dairy		2020-10-28	C488	25	Neg	Neg	Neg	1	1	Neg	Neg	Neg	C488
22	C489	97		Dairy		2020-10-28	C489	24	Neg	Neg	Neg	1	1	Neg	Neg	Neg	C489
23	C490	514		Dairy		2020-10-28	C490	29	Neg	Neg	Neg	1	Neg	Neg	Neg	Neg	C490
24	C491	114		Dairy		2020-10-28	C491	31	Neg	Neg	Neg	1	1	Neg	Neg	Neg	C491
25	C492	813		Dairy		2020-10-28	C492	22 clot	Neg	Neg	Neg	1	1	Neg	Neg	Neg	C492
26	C493	7		Dairy		2020-10-28	C493	23	Neg	Neg	Neg	1	1	Neg	Neg	Neg	C493
27	C494	T12		Dairy		2020-10-28	C494	28	Neg	Neg	Neg	1	Neg	Neg	Neg	Neg	C494
28	C495	914		Dairy		2020-10-28	C495	22	Neg	Neg	Neg	1	1	Neg	Neg	Neg	C495
29	C496	812		Dairy		2020-10-28	C496	30	Neg	Neg	Neg	Neg	Neg	Neg	Neg	Neg	C496
30	C497	101		Dairy		2020-10-28	C497	23	Neg	Neg	Neg	1	1	Neg	Neg	Neg	C497
31	C498	85		Dairy		2020-10-28	C498	24	Neg	Neg	Neg	Neg	Neg	Neg	Neg	Neg	C498
32	C499	2		Dairy		2020-10-28	C499	28	Neg	Neg	Neg	1	1	Neg	Neg	Neg	C499
33	C500	4		Dairy		2020-10-28	C500	28	Neg	Neg	Neg	Neg	1	Neg	Neg	Neg	C500
34	C501	6		Dairy		2020-10-28	C501	25 clot	Neg	Neg	Neg	1	Neg	Neg	Neg	Neg	C501
35	C502	T2		Dairy		2020-10-28	C502	24	Neg	Neg	Neg	1	Neg	Neg	Neg	Neg	C502
36	C503	712		Dairy		2020-10-28	C503	28	Neg	Neg	Neg	1	1	Neg	Neg	Neg	C503
37	C504	2-1		Dairy		2020-10-28	C504	23	Neg	Neg	Neg	Neg	1	Neg	Neg	Neg	C504
38	C505	5(5)		Dairy		2020-10-28	C505	25	Neg	Neg	Neg	Neg	Neg	Neg	Neg	Neg	C505
39	C506	(6)		Dairy		2020-10-28	C506	28 clot	Neg	Neg	Neg	Neg	Neg	Neg	Neg	Neg	C506
40	C507	T15		Dairy		2020-10-28	C507	26	Neg	Neg	Neg	Neg	Neg	Neg	Neg	Neg	C507
41	C508	212		Dairy		2020-10-28	C508	35	Neg	Neg	Neg	1	Neg	Neg	Neg	Neg	C508
42	C509	1-81		Dairy		2020-10-28	C509	25	Neg	Neg	Neg	Neg	Neg	Neg	Neg	Neg	C509
43	C510	4-4		Dairy		2020-10-28	C510	26	Neg	Neg	Neg	1	Neg	Neg	Neg	Neg	C510
44	C511	วัวสาวขาวดำ		Dairy		2020-10-28	C511	33	Neg	Neg	Neg	Neg	Neg	Neg	Neg	Neg	C511
												31	24	0	0	0

## Sheet: CM3
No	Sample	Note	cattle information			Date	Sample	PCV (23-33%)	PCR								Sample
									Babesia			Theileria			Anaplasma
			Age (year,month)	Species	District				Babesia spp.	B. bovis	B. bigemina	Theileria spp.	T. orientalis	T. anulata	A. marginale	A. phagocytophilum
1	C456	1		Dairy	Sankampeang	2020-10-22	C456	25	Neg	Neg	Neg	1	1	Neg	Neg	Neg	C456
2	C457	2		Dairy		2020-10-22	C457	21	Neg	Neg	Neg	1	1	Neg	Neg	Neg	C457
3	C458	3		Dairy		2020-10-22	C458	18	Neg	Neg	Neg	1	1	Neg	Neg	Neg	C458
4	C459	4		Dairy		2020-10-22	C459	34	Neg	Neg	Neg	1	Neg	Neg	Neg	Neg	C459
5	C460	5		Dairy		2020-10-22	C460	29	Neg	Neg	Neg	1	Neg	Neg	Neg	Neg	C460
6	C461	6		Dairy		2020-10-22	C461	24	Neg	Neg	Neg	1	1	Neg	Neg	Neg	C461
7	C462	7		Dairy		2020-10-22	C462	25	Neg	Neg	Neg	1	1	Neg	Neg	Neg	C462
8	C463	8		Dairy		2020-10-22	C463	28	Neg	Neg	Neg	1	Neg	Neg	Neg	Neg	C463
9	C464	9		Dairy		2020-10-22	C464	30	Neg	Neg	Neg	1	Neg	Neg	Neg	Neg	C464
10	C465	10		Dairy		2020-10-22	C465	28	Neg	Neg	Neg	1	1	Neg	Neg	Neg	C465
11	C466	11		Dairy		2020-10-22	C466	28	Neg	Neg	Neg	1	1	Neg	Neg	Neg	C466
12	C467	12		Dairy		2020-10-22	C467	13	Neg	Neg	Neg	1	1	Neg	Neg	Neg	C467
												12	8

## Sheet: NKP
No	Sample	Note	cattle information			Date	Sample	PCV (23-33%)	PCR
									Babesia			Theileria			Anaplasma		Sample
			Age (year,month)	Species	District				Babesia spp.	B. bovis	B. bigemina	Theileria spp.	T. orientalis	T. anulata	A. marginale	A. phagocytophilum
1	C375	5939	N/A	Dairy	กำแพงแสน/นครปฐม	2020-09-17	C375	30	Neg	Neg	Neg	Neg	Neg	Neg	Neg	Neg	C375
2	C376	5836	N/A	Dairy		2020-09-17	C376	23	Neg	Neg	Neg	Neg	Neg	Neg	Neg	Neg	C376
3	C377	5926	N/A	Dairy		2020-09-17	C377	27	Neg	Neg	Neg	Neg	Neg	Neg	Neg	Neg	C377
4	C378	5915	N/A	Dairy		2020-09-17	C378	23	Neg	Neg	Neg	1	Neg	Neg	Neg	Neg	C378
5	C379	5714	N/A	Dairy		2020-09-17	C379	31	Neg	Neg	Neg	Neg	Neg	Neg	Neg	Neg	C379
6	C380	6006	N/A	Dairy		2020-09-17	C380	27	Neg	Neg	Neg	Neg	Neg	Neg	1	Neg	C380
7	C381	6018	N/A	Dairy		2020-09-17	C381	23	Neg	Neg	Neg	Neg	Neg	Neg	Neg	Neg	C381
8	C382	5802	N/A	Dairy		2020-09-17	C382	29	Neg	Neg	Neg	1	Neg	Neg	Neg	Neg	C382
9	C383	6015	N/A	Dairy		2020-09-17	C383	20	_	Neg	Neg	Neg	Neg	Neg	1	Neg	C383
10	C384	6014	N/A	Dairy		2020-09-17	C384	19	Neg	Neg	Neg	Neg	Neg	Neg	Neg	Neg	C384
11	C385	6029	N/A	Dairy		2020-09-17	C385	31		Neg	Neg	Neg	Neg	Neg	Neg	Neg	C385
12	C386	6010	N/A	Dairy		2020-09-17	C386	30	Neg	Neg	Neg	Neg	Neg	Neg	1	Neg	C386
13	C387	5938	N/A	Dairy		2020-09-17	C387	29	_	Neg	Neg	Neg	Neg	Neg	1	Neg	C387
14	C388	6102	N/A	Dairy		2020-09-17	C388	22	_	Neg	Neg	Neg	Neg	Neg	Neg	Neg	C388
15	C389	6019	N/A	Dairy		2020-09-17	C389	23	Neg	Neg	Neg	1	Neg	Neg	Neg	Neg	C389
16	C390	5825	N/A	Dairy		2020-09-17	C390	25	Neg	Neg	Neg	1	Neg	Neg	Neg	Neg	C390
17	C391	6017	N/A	Dairy		2020-09-17	C391	22	Neg	Neg	Neg	Neg	Neg	Neg	Neg	Neg	C391
18	C392	5906	N/A	Dairy		2020-09-17	C392	31	_	Neg	Neg	Neg	Neg	Neg	1	Neg	C392
19	C393	5942	N/A	Dairy		2020-09-17	C393	32	Neg	Neg	Neg	Neg	Neg	Neg	Neg	Neg	C393
20	C394	5944	N/A	Dairy		2020-09-17	C394	29	Neg	Neg	Neg	Neg	Neg	Neg	Neg	Neg	C394
21	C395	6024	N/A	Dairy		2020-09-17	C395	23	_	Neg	Neg	Neg	Neg	Neg	1	Neg	C395
22	C396	5736	N/A	Dairy		2020-09-17	C396	29	Neg	Neg	Neg	1	Neg	Neg	Neg	Neg	C396
23	C397	5838	N/A	Dairy		2020-09-17	C397	23	Neg	Neg	Neg	1	Neg	Neg	Neg	Neg	C397
24	C398	5801	N/A	Dairy		2020-09-17	C398	28	Neg	Neg	Neg	1	Neg	Neg	Neg	Neg	C398
25	C399	6020	N/A	Dairy		2020-09-17	C399	28	_	Neg	Neg	Neg	Neg	Neg	1	Neg	C399
26	C400	5728	N/A	Dairy		2020-09-17	C400	30	Neg	Neg	Neg	1	Neg	Neg	Neg	Neg	C400
27	C401	5821	N/A	Dairy		2020-09-17	C401	25	_	Neg	Neg	Neg	Neg	Neg	1	Neg	C401
28	C402	5742	N/A	Dairy		2020-09-17	C402	33	Neg	Neg	Neg	1	Neg	Neg	Neg	Neg	C402
29	C403	5142	N/A	Beef		2020-09-17	C403	26	Neg	Neg	Neg	Neg	Neg	Neg	Neg	Neg	C403
30	C404	5747	N/A	Beef		2020-09-17	C404	24	Neg	Neg	Neg	Neg	Neg	Neg	Neg	Neg	C404
31	C405	5040	N/A	Beef		2020-09-17	C405	24	Neg	Neg	Neg	1	Neg	Neg	Neg	Neg	C405
32	C406	5564	N/A	Beef		2020-09-17	C406	39	Neg	Neg	Neg	1	Neg	Neg	Neg	Neg	C406
33	C407	5537	N/A	Beef		2020-09-17	C407	25	Neg	Neg	Neg	Neg	Neg	Neg	Neg	Neg	C407
34	C408	5908	N/A	Beef		2020-09-17	C408	27	Neg	Neg	Neg	Neg	Neg	Neg	Neg	Neg	C408
35	C409	5909	N/A	Beef		2020-09-17	C409	30	Neg	Neg	Neg	Neg	Neg	Neg	Neg	Neg	C409
36	C410	5726	N/A	Beef		2020-09-17	C410	29	Neg	Neg	Neg	Neg	Neg	Neg	Neg	Neg	C410
37	C411	5906	N/A	Beef		2020-09-17	C411	23	Neg	Neg	Neg	Neg	Neg	Neg	Neg	Neg	C411
38	C412	5455	N/A	Beef		2020-09-17	C412	29	Neg	Neg	Neg	1	Neg	Neg	Neg	Neg	C412
39	C413	5538	N/A	Beef		2020-09-17	C413	35	_	Neg	Neg	Neg	Neg	Neg	1	Neg	C413
40	C414	5732	N/A	Beef		2020-09-17	C414	30	Neg	Neg	Neg	Neg	Neg	Neg	Neg	Neg	C414
41	C415	5562	N/A	Beef		2020-09-17	C415	37	Neg	Neg	Neg	1	Neg	Neg	Neg	Neg	C415
42	C416	5340	N/A	Beef		2020-09-17	C416	31	Neg	Neg	Neg	1	Neg	Neg	Neg	Neg	C416
43	C417	5753	N/A	Beef		2020-09-17	C417	28	Neg	Neg	Neg	1	Neg	Neg	Neg	Neg	C417
44	C418	5550	N/A	Beef		2020-09-17	C418	26	Neg	Neg	Neg	1	Neg	Neg	Neg	Neg	C418
45	C419	5352	N/A	Beef		2020-09-17	C419	25	Neg	Neg	Neg	1	Neg	Neg	Neg	Neg	C419
46	C420	5447	N/A	Beef		2020-09-17	C420	27	Neg	Neg	Neg	1	Neg	Neg	Neg	Neg	C420
47	C421	5533	N/A	Beef		2020-09-17	C421	29	Neg	Neg	Neg	1	Neg	Neg	Neg	Neg	C421
48	C422	5542	N/A	Beef		2020-09-17	C422	26	Neg	Neg	Neg	1	Neg	Neg	Neg	Neg	C422
49	C423	5202	N/A	Beef		2020-09-17	C423	30	Neg	Neg	Neg	1	Neg	Neg	Neg	Neg	C423
50	C424	5558	N/A	Beef		2020-09-17	C424	32	Neg	Neg	Neg	1	Neg	Neg	Neg	Neg	C424
51	C425	5837	N/A	Beef		2020-09-17	C425	24	Neg	Neg	Neg	1	Neg	Neg	Neg	Neg	C425
52	C426	5606	N/A	Beef		2020-09-17	C426	30	Neg	Neg	Neg	1	Neg	Neg	Neg	Neg	C426
53	C427	วัวมีเขา	N/A	Beef		2020-09-17	C427	25	Neg	Neg	Neg	1	Neg	Neg	Neg	Neg	C427
54	C428	5337	N/A	Beef		2020-09-17	C428	23	Neg	Neg	Neg	1	Neg	Neg	Neg	Neg	C428
55	C429	5363	N/A	Beef		2020-09-17	C429	32	Neg	Neg	Neg	1	Neg	Neg	Neg	Neg	C429
56	C430	หนึ่ง	0,7	Dairy	กำแพงแสน/นครปฐม	2020-09-18	C430	26	Neg	Neg	Neg	1	Neg	Neg	Neg	Neg	C430
57	C431	สอง	0,7	Dairy		2020-09-18	8	26	Neg	1	Neg	1	Neg	Neg	Neg	Neg	C431
58	C432	ชินจัง	0,6	Dairy		2020-09-18	C432	22	Neg	Neg	Neg	Neg	1	Neg	Neg	Neg	C432
59	C433	เปราะ	0,6	Dairy		2020-09-18	C433	13	Neg	Neg	Neg	Neg	1	Neg	Neg	Neg	C433
60	C434	พลอย	0,6	Beef		2020-09-18	C434	33	Neg	Neg	Neg	1	1	Neg	Neg	Neg	C434
61	C435	ใหม่	3,3	Beef		2020-09-18	C435	23	Neg	Neg	Neg	1	Neg	Neg	Neg	Neg	C435
62	C436	570	5,6	Dairy	กำแพงแสน/นครปฐม	2020-09-18	C436	clot	Neg	Neg	Neg	1	1	Neg	Neg	Neg	C436
63	C437	456	5,2	Dairy		2020-09-18	C437	34	Neg	Neg	Neg	1	Neg	Neg	Neg	Neg	C437
64	C438	1730	3,10	Dairy		2020-09-18	C438	23	Neg	Neg	Neg	1	Neg	Neg	Neg	Neg	C438
65	C439	39	3,9	Dairy		2020-09-18	C439	25	Neg	Neg	Neg	1	1	Neg	Neg	Neg	C439
66	C440	32	3,11	Dairy		2020-09-18	C440	30	Neg	Neg	Neg	Neg	Neg	Neg	Neg	Neg	C440
67	C441	จิ๋มใหญ่	3,8	Dairy		2020-09-18	C441	18	Neg	Neg	Neg	1	1	Neg	Neg	Neg	C441
68	C442	586	5,1	Dairy		2020-09-18	C442	25	Neg	Neg	Neg	1	1	Neg	Neg	Neg	C442
69	C443	หนีบ593	5	Dairy		2020-09-18	C443	clot	Neg	Neg	Neg	Neg	1	Neg	1	Neg	C443
70	C444	423	6,4	Dairy		2020-09-18	C444	25	Neg	Neg	Neg	1	Neg	Neg	Neg	Neg	C444
71	C445	591	5	Dairy		2020-09-18	C445	32	Neg	Neg	Neg	Neg	Neg	Neg	Neg	Neg	C445
72	C446	3	4,6	Dairy		2020-09-18	C446	22	Neg	Neg	Neg	Neg	Neg	Neg	1	Neg	C446
73	C447	มดแดง	2,2	Dairy		2020-09-18	C447	24	Neg	Neg	Neg	Neg	Neg	Neg	Neg	Neg	C447
74	C448	บุญเลื่อง	3,8	Dairy		2020-09-18	C448	26	Neg	Neg	Neg	Neg	Neg	Neg	Neg	Neg	C448
75	C449	หงอก	3,8	Dairy		2020-09-18	C449	20	Neg	Neg	Neg	Neg	Neg	Neg	Neg	Neg	C449
76	C450	ทิฟฟี่	2,5	Dairy		2020-09-18	C450	29	Neg	Neg	Neg	Neg	Neg	Neg	Neg	Neg	C450
77	C451	573	5,6	Dairy		2020-09-18	C451	32	Neg	Neg	Neg	1	Neg	Neg	Neg	Neg	C451
78	C452	35	3,9	Dairy		2020-09-18	C452	25	Neg	Neg	Neg	Neg	Neg	Neg	1	Neg	C452
79	C453	347	5,7	Dairy		2020-09-18	C453	22	Neg	Neg	Neg	Neg	Neg	Neg	1	Neg	C453
80	C454	80	2,4	Dairy		2020-09-18	C454	25	Neg	Neg	Neg	Neg	Neg	Neg	Neg	Neg	C454
81	C455	587	5,2	Dairy		2020-09-18	C455	30	Neg	Neg	Neg	Neg	Neg	Neg	Neg	Neg	C455
									1	1	0	39	8	0	13	0

[truncated: 7 more sheets: LPU3, CM2, LPU2, LPU1, LPU, CM1, CM]
